# Supplementary material for: Factors influencing the efficiency of cocoa farms: A study to increase income in rural Indonesia
Source: PLoS One. 2019 Apr 4;14(4):e0214569. doi: 10.1371/journal.pone.0214569 (PMC6448898; doi:10.1371/journal.pone.0214569)
Supplement: S3 File — (XLS) [file pone.0214569.s003.xls]

## Sheet: DATA
Resp.	Land (ha /farm)	Cost of land (IDR)	Chemical fertilizer (kg/farm/year)	Cost of Chemical fertilizer (IDR)	Labor (man-days /farm/year)	Cost of labor (IDR)	Cost of pesticide (IDR)	Cost of pruning (IDR)	Cost of sanitation (IDR)	Actual cost (IDR)	Output (kg/farm/ year)	Output (kg/ha/year)	CRS			VRS			SE	Actual cost (IDR)	Minimum cost (IDR)	Reducs cost (IDR)	Reducs cost (%)	Type of seed	Use of organic fertilizer	Extension and training	Access to credit	Access to market	Participation of women	Gender of cocoa farm managers
													TE	AE	EE	TE	AE	EE
1	1	1500000	500	1250000	145	7250000	385370	300000	600000	11285370	1125	1125	0.882	0.492	0.434	1	0.461	0.461	0.882	11285370	4.89785e+06	6.38752e+06	56.6	0	0	5	1	1	0.53	0
2	2	3000000	1200	3000000	355	17750000	2158072	600000	1200000	27708072	2624	1312	0.913	0.435	0.397	0.963	0.412	0.397	0.948079	27708072	1.10001e+07	1.6708e+07	60.3	1	0	5	1	1	0.61	0
3	2	3000000	1400	3500000	356	17800000	2158072	200000	200000	26858072	1400	700	0.624	0.712	0.445	0.744	0.623	0.463	0.83871	26858072	1.19518e+07	1.49062e+07	55.5	0	0	3	0	0	0.2	0
4	1	1500000	650	1625000	180	9000000	539518	200000	300000	13164518	1375	1375	0.942	0.833	0.785	1	0.818	0.818	0.942	13164518	1.03341e+07	2.83037e+06	21.5	1	1	8	1	1	0.66	1
5	1	1500000	700	1750000	198	9900000	616592	200000	400000	14366592	1600	1600	1	0.763	0.763	1	0.786	0.786	1	14366592	1.09617e+07	3.40488e+06	23.7	1	1	8	1	1	0.74	1
6	2	3000000	1200	3000000	324	16200000	1849776	400000	800000	25249776	2600	1300	0.919	0.586	0.539	0.958	0.563	0.539	0.95929	25249776	1.36096e+07	1.16401e+07	46.1	1	1	7	1	1	0.56	1
7	2	3000000	1000	2500000	325	16250000	2158072	400000	800000	25108072	2316	1158	0.908	0.496	0.45	0.971	0.467	0.453	0.935118	25108072	1.12986e+07	1.38094e+07	55	1	1	6	1	1	0.56	1
8	1.5	2250000	1000	2500000	289	14450000	1387332	300000	600000	21487332	2077	1384.67	0.896	0.64	0.574	0.936	0.62	0.581	0.957265	21487332	1.23337e+07	9.1536e+06	42.6	1	1	6	1	1	0.55	1
9	1	1500000	500	1250000	120	6000000	385370	200000	300000	9635370	1000	1000	0.834	0.752	0.627	1	0.676	0.676	0.834	9635370	6.04138e+06	3.59399e+06	37.3	1	1	6	0	0	0.47	1
10	2	3000000	1200	3000000	289	14450000	1849776	400000	600000	23299776	2500	1250	0.919	0.633	0.582	0.923	0.632	0.583	0.995666	23299776	1.35605e+07	9.73931e+06	41.8	1	1	7	1	1	0.56	1
11	2	3000000	1000	2500000	278	13900000	1849776	600000	1000000	22849776	2000	1000	0.791	0.439	0.347	0.808	0.436	0.352	0.97896	22849776	7.92887e+06	1.49209e+07	65.3	0	0	4	0	0	0.42	0
12	2	3000000	1000	2500000	267	13350000	1541480	200000	400000	20991480	2116	1058	0.981	0.708	0.694	0.988	0.711	0.702	0.992915	20991480	1.45681e+07	6.42339e+06	30.6	1	1	8	1	1	0.62	1
13	1	1500000	600	1500000	145	7250000	462444	1200000	400000	12312444	1380	1380	1	0.351	0.351	1	0.365	0.365	1	12312444	4.32167e+06	7.99078e+06	64.9	0	0	5	1	1	0.64	0
14	3	4500000	1500	3750000	398	19900000	3699552	1500000	3600000	36949552	3639	1213	0.97	0.229	0.222	1	0.352	0.352	0.97	36949552	8.2028e+06	2.87468e+07	77.8	0	0	5	1	1	0.61	0
15	1.5	2250000	900	2250000	232	11600000	867082	1800000	1800000	2.05671e+07	1968	1312	0.936	0.227	0.212	0.938	0.23	0.215	0.997868	2.05671e+07	4.36022e+06	1.62069e+07	78.8	1	0	5	1	1	0.61	0
16	2	3000000	1200	3000000	278	13900000	1541480	400000	200000	22041480	2644	1322	1	0.907	0.907	1	0.922	0.922	1	22041480	1.99916e+07	2.04986e+06	9.3	1	1	8	1	1	0.67	1
17	1	1500000	750	1875000	154	7700000	385370	1200000	300000	12960370	1421	1421	1	0.396	0.396	1	0.411	0.411	1	12960370	5.13231e+06	7.82806e+06	60.4	0	0	5	1	1	0.68	0
18	2	3000000	1300	3250000	287	14350000	2158072	2400000	600000	25758072	2780	1390	0.996	0.324	0.323	1	0.361	0.361	0.996	25758072	8.31986e+06	1.74382e+07	67.7	0	0	4	1	1	0.66	0
19	1	1500000	600	1500000	132	6600000	462444	200000	200000	10462444	1230	1230	0.988	0.885	0.874	1	0.921	0.921	0.988	10462444	9.14418e+06	1.31827e+06	12.6	1	1	8	1	1	0.59	1
20	1	1500000	500	1250000	120	6000000	462444	400000	600000	10212444	1012	1012	0.83	0.425	0.352	1	0.379	0.379	0.83	10212444	3.59478e+06	6.61766e+06	64.8	1	0	3	0	0	0.51	0
21	2	3000000	1200	3000000	285	14250000	2158072	200000	600000	23208072	2690	1345	1	0.639	0.639	1	0.671	0.671	1	23208072	1.483e+07	8.37811e+06	36.1	1	1	8	1	1	0.55	1
22	1.5	2250000	800	2000000	143	7150000	1040499	150000	450000	13040499	1470	980	1	0.573	0.573	1	0.594	0.594	1	13040499	7.47221e+06	5.56829e+06	42.7	1	1	7	1	1	0.7	1
23	2	3000000	1200	3000000	287	14350000	1849776	200000	800000	23199776	2600	1300	0.987	0.595	0.587	1	0.587	0.587	0.987	23199776	1.36183e+07	9.58151e+06	41.3	1	1	7	1	1	0.68	1
24	2.5	3750000	1600	4000000	365	18250000	3468330	500000	750000	30718330	3380	1352	0.97	0.532	0.516	1	0.757	0.757	0.97	30718330	1.58507e+07	1.48677e+07	48.4	1	1	7	1	1	0.59	1
25	2	3000000	1000	2500000	254	12700000	1695628	200000	1000000	21095628	2200	1100	0.959	0.478	0.458	0.96	0.481	0.462	0.998958	21095628	9.6618e+06	1.14338e+07	54.2	1	1	6	1	1	0.51	1
26	1	1500000	300	750000	89	4450000	308296	300000	400000	7708296	950	950	1	0.48	0.48	1	0.52	0.52	1	7708296	3.69998e+06	4.00831e+06	52	1	1	6	1	1	0.4	1
27	1	1500000	400	1000000	88	4400000	308296	300000	600000	8108296	750	750	0.798	0.374	0.298	1	0.336	0.336	0.798	8108296	2.41627e+06	5.69202e+06	70.2	0	0	2	1	0	0.48	0
28	2	3000000	1200	3000000	295	14750000	2466368	800000	1200000	25216368	2624	1312	0.947	0.378	0.358	0.964	0.371	0.358	0.982365	25216368	9.02746e+06	1.61889e+07	64.2	1	0	3	1	1	0.68	0
29	2	3000000	1500	3750000	285	14250000	2466368	800000	1200000	25466368	3000	1500	1	0.41	0.41	1	0.517	0.517	1	25466368	1.04412e+07	1.50252e+07	59	1	0	5	1	1	0.55	0
30	1.5	2250000	750	1875000	168	8400000	924888	300000	450000	14199888	1500	1000	0.862	0.634	0.546	0.863	0.655	0.565	0.998841	14199888	7.75314e+06	6.44675e+06	45.4	1	1	6	0	0	0.53	1
31	2	3000000	1200	3000000	287	14350000	2003924	400000	600000	23353924	2630	1315	0.969	0.609	0.591	0.976	0.608	0.593	0.992828	23353924	1.38022e+07	9.55175e+06	40.9	1	1	7	1	1	0.54	1
32	2	3000000	1000	2500000	240	12000000	2003924	600000	600000	20703924	2444	1222	1	0.504	0.504	1	0.505	0.505	1	20703924	1.04348e+07	1.02691e+07	49.6	1	1	7	1	1	0.73	1
33	1	1500000	600	1500000	167	8350000	539518	200000	1000000	13089518	1325	1325	0.929	0.395	0.366	1	0.383	0.383	0.929	13089518	4.79076e+06	8.29875e+06	63.4	1	0	4	1	1	0.57	0
34	1	1500000	600	1500000	134	6700000	539518	300000	1200000	11739518	1288	1288	0.956	0.31	0.296	1	0.311	0.311	0.956	11739518	3.4749e+06	8.26462e+06	70.4	0	0	4	1	1	0.52	0
35	2	3000000	1200	3000000	240	12000000	1541480	800000	600000	20941480	2300	1150	0.938	0.513	0.481	0.943	0.514	0.485	0.994698	20941480	1.00729e+07	1.08686e+07	51.9	1	1	6	1	1	0.66	1
36	1.5	2250000	900	2250000	261	13050000	1156110	300000	450000	19456110	2025	1350	0.954	0.711	0.679	0.976	0.705	0.688	0.977459	19456110	1.32107e+07	6.24541e+06	32.1	1	1	8	1	1	0.69	1
37	1	1500000	700	1750000	189	9450000	385370	300000	600000	13985370	1547	1547	0.985	0.606	0.597	1	0.616	0.616	0.985	13985370	8.34927e+06	5.6361e+06	40.3	1	1	8	1	1	0.73	1
38	2	3000000	1200	3000000	287	14350000	2312220	200000	600000	23462220	2668	1334	0.992	0.615	0.61	0.993	0.636	0.632	0.998993	23462220	1.4312e+07	9.15027e+06	39	1	1	8	1	1	0.6	1
39	2	3000000	1200	3000000	265	13250000	1849776	400000	600000	22099776	2460	1230	0.93	0.616	0.573	0.932	0.616	0.574	0.997854	22099776	1.26632e+07	9.4366e+06	42.7	1	1	7	1	1	0.48	1
40	1	1500000	400	1000000	123	6150000	385370	300000	300000	9635370	1000	1000	0.9	0.619	0.557	1	0.601	0.601	0.9	9635370	5.3669e+06	4.26847e+06	44.3	1	1	7	1	1	0.6	1
41	1.5	2250000	1000	2500000	231	11550000	1387332	300000	750000	18737332	2031	1354	0.931	0.542	0.505	0.932	0.55	0.512	0.998927	18737332	9.46235e+06	9.27498e+06	49.5	1	1	7	1	1	0.63	1
42	2	3000000	1200	3000000	287	14350000	1849776	400000	800000	23399776	2624	1312	0.962	0.565	0.543	0.971	0.56	0.543	0.990731	23399776	1.27061e+07	1.06937e+07	45.7	1	1	7	1	1	0.63	1
43	1	1500000	600	1500000	145	7250000	462444	100000	600000	11412444	1232	1232	1	0.542	0.542	1	0.571	0.571	1	11412444	6.18554e+06	5.2269e+06	45.8	1	1	7	1	1	0.43	1
44	2	3000000	800	2000000	198	9900000	1541480	400000	2400000	19241480	1960	980	0.938	0.238	0.223	0.984	0.231	0.227	0.953252	19241480	4.29085e+06	1.49506e+07	77.7	0	0	4	1	1	0.34	0
45	1	1500000	300	750000	90	4500000	385370	200000	200000	7535370	950	950	1	0.716	0.716	1	0.777	0.777	1	7535370	5.39532e+06	2.14005e+06	28.4	1	1	8	1	1	0.39	1
46	1	1500000	500	1250000	92	4600000	385370	200000	200000	8135370	900	900	0.935	0.725	0.678	1	0.741	0.741	0.935	8135370	5.51578e+06	2.61959e+06	32.2	1	1	8	1	1	0.49	1
47	2	3000000	1200	3000000	247	12350000	1849776	400000	200000	20799776	1000	500	0.423	0.732	0.31	0.608	0.548	0.334	0.695724	20799776	6.44793e+06	1.43518e+07	69	0	0	3	0	0	0.02	0
48	1	1500000	700	1750000	152	7600000	385370	200000	200000	11635370	1243	1243	0.978	0.957	0.936	1	0.985	0.985	0.978	11635370	1.08907e+07	744664	6.4	1	1	10	1	1	0.41	1
49	2	3000000	900	2250000	198	9900000	1541480	200000	200000	17091480	1300	650	0.744	0.695	0.517	0.837	0.647	0.542	0.888889	17091480	8.8363e+06	8.25518e+06	48.3	1	1	6	0	0	0.34	1
50	1	1500000	600	1500000	120	6000000	385370	200000	200000	9785370	1000	1000	0.874	0.862	0.753	1	0.812	0.812	0.874	9785370	7.36838e+06	2.41699e+06	24.7	1	1	6	1	1	0.52	1
51	2	3000000	1400	3500000	352	17600000	1849776	400000	200000	26549776	1200	600	0.454	0.818	0.371	0.647	0.606	0.392	0.7017	26549776	9.84997e+06	1.66998e+07	62.9	0	0	4	0	0	0.14	0
52	1	1500000	300	750000	87	4350000	385370	200000	200000	7385370	600	600	0.653	0.692	0.452	1	0.53	0.53	0.653	7385370	3.33819e+06	4.04718e+06	54.8	1	1	4	0	0	0.22	1
53	2	3000000	1000	2500000	156	7800000	1233184	400000	400000	15333184	1500	750	0.909	0.527	0.479	0.927	0.535	0.496	0.980583	15333184	7.3446e+06	7.98859e+06	52.1	1	1	7	1	1	0.55	1
54	1	1500000	600	1500000	125	6250000	385370	200000	200000	10035370	1000	1000	0.85	0.886	0.753	1	0.812	0.812	0.85	10035370	7.55663e+06	2.47874e+06	24.7	1	1	6	0	0	0.29	1
55	2	3000000	1200	3000000	187	9350000	1541480	600000	400000	17891480	1800	900	0.92	0.509	0.468	0.948	0.504	0.478	0.970464	17891480	8.37321e+06	9.51827e+06	53.2	1	1	6	1	1	0.23	1
56	2	3000000	800	2000000	150	7500000	1233184	2400000	2400000	18533184	1300	650	0.812	0.129	0.104	0.816	0.134	0.109	0.995098	18533184	1.92745e+06	1.66057e+07	89.6	0	0	3	0	0	0.21	0
57	1	1500000	500	1250000	113	5650000	308296	200000	200000	9108296	950	950	0.886	0.858	0.761	1	0.826	0.826	0.886	9108296	6.93141e+06	2.17688e+06	23.9	1	1	6	1	1	0.28	1
58	1	1500000	300	750000	78	3900000	308296	200000	200000	6858296	650	650	0.789	0.659	0.521	1	0.601	0.601	0.789	6858296	3.57317e+06	3.28512e+06	47.9	1	1	5	0	0	0.39	1
59	1	1500000	600	1500000	121	6050000	385370	200000	200000	9835370	1000	1000	0.869	0.867	0.753	1	0.812	0.812	0.869	9835370	7.40603e+06	2.42934e+06	24.7	1	1	6	1	1	0.26	1
60	1	1500000	500	1250000	90	4500000	231222	200000	200000	7881222	700	700	0.791	0.757	0.599	1	0.682	0.682	0.791	7881222	4.72085e+06	3.16037e+06	40.1	1	1	5	0	0	0.23	1
61	1	1500000	300	750000	112	5600000	231222	200000	200000	8481222	550	550	0.657	0.715	0.47	1	0.602	0.602	0.657	8481222	3.98617e+06	4.49505e+06	53	1	1	5	0	0	0.11	1
62	1.5	2250000	750	1875000	145	7250000	693666	300000	450000	12818666	990	660	0.647	0.61	0.394	0.667	0.639	0.426	0.970015	12818666	5.05055e+06	7.76811e+06	60.6	0	0	4	0	0	0.22	0
63	1	1500000	600	1500000	120	6000000	385370	200000	200000	9785370	1100	1100	0.961	0.862	0.828	1	0.882	0.882	0.961	9785370	8.10229e+06	1.68308e+06	17.2	1	1	8	1	1	0.25	1
64	1	1500000	300	750000	78	3900000	308296	200000	200000	6858296	500	500	0.607	0.659	0.4	1	0.563	0.563	0.607	6858296	2.74332e+06	4.11498e+06	60	1	0	3	0	0	0.25	0
65	3	4500000	1500	3750000	457	22850000	3468330	600000	600000	35768330	2400	800	0.651	0.58	0.378	0.689	0.551	0.379	0.944848	35768330	1.35204e+07	2.22479e+07	62.2	0	0	3	0	0	0.06	0
66	1	1500000	300	750000	89	4450000	231222	200000	200000	7331222	650	650	0.777	0.715	0.556	1	0.642	0.642	0.777	7331222	4.07616e+06	3.25506e+06	44.4	1	1	4	0	0	0.27	1
67	1	1500000	600	1500000	123	6150000	385370	100000	200000	9835370	1000	1000	1	0.887	0.887	1	0.955	0.955	1	9835370	8.72397e+06	1.1114e+06	11.3	1	1	9	1	1	0.47	1
68	1	1500000	400	1000000	112	5600000	385370	200000	200000	8885370	550	550	0.519	0.798	0.414	1	0.53	0.53	0.519	8885370	3.67854e+06	5.20683e+06	58.6	0	0	4	0	0	0.07	0
69	1	1500000	600	1500000	125	6250000	385370	200000	200000	10035370	950	950	0.807	0.886	0.716	1	0.777	0.777	0.807	10035370	7.18532e+06	2.85005e+06	28.4	1	1	5	1	1	0.39	1
70	2	3000000	1000	2500000	240	12000000	1849776	400000	400000	20149776	1700	850	0.711	0.636	0.452	0.711	0.651	0.463	1	20149776	9.1077e+06	1.10421e+07	54.8	1	0	4	0	0	0.02	0
71	2	3000000	1200	3000000	190	9500000	1849776	400000	200000	17949776	1740	870	0.94	0.573	0.539	0.963	0.573	0.551	0.976116	17949776	9.67493e+06	8.27485e+06	46.1	1	1	6	1	1	0.58	1
72	1	1500000	600	1500000	132	6600000	308296	200000	200000	10308296	925	925	0.786	0.943	0.741	1	0.807	0.807	0.786	10308296	7.63845e+06	2.66985e+06	25.9	1	1	5	0	0	0.51	1
73	2	3000000	1300	3250000	285	14250000	1541480	400000	400000	22841480	2230	1115	0.816	0.793	0.647	0.825	0.791	0.652	0.989091	22841480	1.47784e+07	8.06304e+06	35.3	1	1	5	0	0	0.36	1
74	1	1500000	300	750000	121	6050000	231222	100000	100000	8731222	600	600	0.902	0.946	0.853	1	1	1	0.902	8731222	7.44773e+06	1.28349e+06	14.7	1	1	7	1	1	0.47	1
75	2	3000000	800	2000000	257	12850000	1541480	200000	800000	20391480	1300	650	0.678	0.466	0.316	0.712	0.465	0.331	0.952247	20391480	6.44371e+06	1.39478e+07	68.4	0	0	0	0	0	0.24	0
76	2	3000000	1200	3000000	240	12000000	1541480	200000	200000	19941480	1950	975	1	0.776	0.776	1	0.788	0.788	1	19941480	1.54746e+07	4.46689e+06	22.4	1	1	8	1	1	0.29	1
77	1	1500000	400	1000000	85	4250000	308296	300000	300000	7658296	600	600	0.665	0.526	0.35	1	0.41	0.41	0.665	7658296	2.6804e+06	4.97789e+06	65	0	0	4	0	0	0.22	0
78	1.5	2250000	900	2250000	185	9250000	809277	150000	150000	14859277	1335	890	1	0.873	0.873	1	0.912	0.912	1	14859277	1.29721e+07	1.88713e+06	12.7	1	1	9	1	1	0.4	1
79	2	3000000	1200	3000000	298	14900000	2003924	200000	200000	23303924	2242	1121	1	0.75	0.75	1	0.756	0.756	1	23303924	17477943	5825981	25	1	1	9	1	1	0.48	1
80	1	1500000	600	1500000	98	4900000	308296	200000	200000	8608296	850	850	0.872	0.781	0.681	1	0.751	0.751	0.872	8608296	5.86225e+06	2.74605e+06	31.9	1	1	6	1	1	0.36	1
81	1.5	2250000	1000	2500000	198	9900000	1040499	300000	1500000	17490499	1500	1000	0.719	0.368	0.265	0.763	0.359	0.274	0.942333	17490499	4.63498e+06	1.28555e+07	73.5	0	0	3	0	0	0.36	0
82	2	3000000	1000	2500000	154	7700000	1233184	400000	2400000	17233184	1260	630	0.771	0.193	0.149	0.771	0.203	0.157	1	17233184	2.56774e+06	1.46654e+07	85.1	0	0	3	0	0	0.48	0
83	1	1500000	600	1500000	132	6600000	385370	300000	100000	10385370	500	500	0.539	0.736	0.396	1	0.558	0.558	0.539	10385370	4.11261e+06	6.27276e+06	60.4	0	0	3	0	0	0.11	0
84	2	3000000	1200	3000000	240	12000000	1849776	200000	200000	20249776	1960	980	1	0.692	0.692	1	0.703	0.703	1	20249776	1.40128e+07	6.23693e+06	30.8	1	1	7	1	1	0.49	1
85	3	4500000	1400	3500000	487	24350000	3468330	600000	600000	37018330	1800	600	0.507	0.558	0.283	0.524	0.553	0.289	0.967557	37018330	1.04762e+07	2.65421e+07	71.7	0	0	4	0	0	0.11	0
86	2	3000000	1200	3000000	253	12650000	2312220	400000	400000	21762220	1200	600	0.48	0.59	0.283	0.502	0.595	0.299	0.956175	21762220	6.15871e+06	1.56035e+07	71.7	0	0	3	0	0	0.07	0
87	2	3000000	1000	2500000	186	9300000	1233184	1200000	2000000	19233184	1560	780	0.787	0.221	0.174	0.792	0.226	0.179	0.993687	19233184	3.34657e+06	1.58866e+07	82.6	0	0	3	0	0	0.2	0
88	2	3000000	1200	3000000	245	12250000	1541480	2200000	1600000	23591480	1952	976	0.754	0.253	0.191	0.754	0.257	0.194	1	23591480	4.50597e+06	1.90855e+07	80.9	0	0	3	0	0	0.04	0
89	2	3000000	900	2250000	185	9250000	1233184	1600000	1000000	18333184	1160	580	0.588	0.277	0.163	0.59	0.292	0.172	0.99661	18333184	2.98831e+06	1.53449e+07	83.7	0	0	3	0	0	0.08	0
90	2	3000000	1200	3000000	190	9500000	1541480	1200000	1800000	20041480	1800	900	0.89	0.231	0.205	0.896	0.234	0.21	0.993304	20041480	4.1085e+06	1.5933e+07	79.5	0	0	3	1	1	0.57	0
91	3	4500000	1800	4500000	485	24250000	5549328	3600000	600000	42999328	3375	1125	0.822	0.283	0.233	1	0.342	0.342	0.822	42999328	1.00188e+07	3.29805e+07	76.7	0	0	3	1	1	0.56	0
92	1.5	2250000	1000	2500000	210	10500000	1156110	300000	1800000	18506110	1500	1000	0.706	0.323	0.228	0.74	0.319	0.236	0.954054	18506110	4.21939e+06	1.42867e+07	77.2	0	0	3	0	0	0.18	0
93	2	3000000	1200	3000000	221	11050000	1541480	400000	200000	19191480	1900	950	0.892	0.731	0.652	0.929	0.714	0.664	0.960172	19191480	1.25128e+07	6.67864e+06	34.8	1	1	4	1	1	0.41	1
94	2	3000000	1000	2500000	223	11150000	1541480	1000000	2400000	21591480	1720	860	0.728	0.237	0.172	0.733	0.241	0.177	0.993179	21591480	3.71373e+06	1.78777e+07	82.8	0	0	3	0	0	0.02	0
95	2	3000000	1000	2500000	243	12150000	1541480	2200000	2200000	23591480	1758	879	0.717	0.207	0.149	0.718	0.212	0.152	0.998607	23591480	3.51513e+06	2.00763e+07	85.1	0	0	2	0	0	0.41	0
96	2	3000000	1200	3000000	298	14900000	1849776	2400000	2400000	27549776	2000	1000	0.72	0.212	0.153	0.722	0.215	0.155	0.99723	27549776	4.21512e+06	2.33347e+07	84.7	0	0	3	0	0	0.36	0
97	2	3000000	600	1500000	158	7900000	1233184	2400000	2200000	18233184	1200	600	0.712	0.142	0.101	0.719	0.148	0.106	0.990264	18233184	1.84155e+06	1.63916e+07	89.9	0	0	2	0	0	0.21	0
98	1.5	2250000	800	2000000	147	7350000	867082	1800000	1800000	1.60671e+07	1125	750	0.719	0.169	0.121	0.721	0.179	0.129	0.997226	1.60671e+07	1.94412e+06	1.4123e+07	87.9	0	0	2	0	0	0.33	0
99	3	4500000	1500	3750000	385	19250000	4161996	3600000	3600000	38861996	2670	890	0.717	0.177	0.127	0.728	0.18	0.131	0.98489	38861996	4.93547e+06	3.39265e+07	87.3	0	0	2	0	0	0.31	0
100	1	1500000	500	1250000	145	7250000	385370	200000	300000	10885370	1125	1125	0.912	0.774	0.706	1	0.75	0.75	0.912	10885370	7.68507e+06	3.2003e+06	29.4	1	1	6	1	1	0.55	1
101	2	3000000	1200	3000000	355	17750000	2158072	600000	1200000	27708072	2624	1312	0.913	0.435	0.397	0.963	0.412	0.397	0.948079	27708072	1.10001e+07	1.6708e+07	60.3	1	0	5	1	1	0.39	0
102	2	3000000	1400	3500000	356	17800000	2158072	200000	200000	26858072	1400	700	0.624	0.712	0.445	0.744	0.623	0.463	0.83871	26858072	1.19518e+07	1.49062e+07	55.5	0	0	4	0	0	0.25	0
103	1	1500000	650	1625000	180	9000000	539518	200000	300000	13164518	1375	1375	0.942	0.833	0.785	1	0.818	0.818	0.942	13164518	1.03341e+07	2.83037e+06	21.5	1	1	7	1	1	0.54	1
104	1	1500000	700	1750000	198	9900000	616592	200000	400000	14366592	1600	1600	1	0.763	0.763	1	0.786	0.786	1	14366592	1.09617e+07	3.40488e+06	23.7	1	1	8	1	1	0.55	1
105	2	3000000	1200	3000000	324	16200000	1849776	400000	800000	25249776	2600	1300	0.919	0.586	0.539	0.958	0.563	0.539	0.95929	25249776	1.36096e+07	1.16401e+07	46.1	1	1	6	1	1	0.33	1
106	2	3000000	1000	2500000	325	16250000	2158072	400000	800000	25108072	2316	1158	0.908	0.496	0.45	0.971	0.467	0.453	0.935118	25108072	1.12986e+07	1.38094e+07	55	1	1	6	1	1	0.55	1
107	1.5	2250000	1000	2500000	289	14450000	1387332	300000	600000	21487332	2077	1384.67	0.896	0.64	0.574	0.936	0.62	0.581	0.957265	21487332	1.23337e+07	9.1536e+06	42.6	1	1	6	1	1	0.39	1
108	1	1500000	500	1250000	120	6000000	385370	200000	300000	9635370	1000	1000	0.834	0.752	0.627	1	0.676	0.676	0.834	9635370	6.04138e+06	3.59399e+06	37.3	1	1	6	1	1	0.32	1
109	2	3000000	1200	3000000	289	14450000	1849776	400000	600000	23299776	2500	1250	0.919	0.633	0.582	0.923	0.632	0.583	0.995666	23299776	1.35605e+07	9.73931e+06	41.8	1	1	7	1	1	0.41	1
110	2	3000000	1000	2500000	278	13900000	1849776	600000	1000000	22849776	2000	1000	0.791	0.439	0.347	0.808	0.436	0.352	0.97896	22849776	7.92887e+06	1.49209e+07	65.3	0	0	4	0	0	0.34	0
111	2	3000000	1000	2500000	267	13350000	1541480	200000	400000	20991480	2116	1058	0.981	0.708	0.694	0.988	0.711	0.702	0.992915	20991480	1.45681e+07	6.42339e+06	30.6	1	1	7	0	0	0.37	1
112	1	1500000	600	1500000	145	7250000	462444	1200000	400000	12312444	1380	1380	1	0.351	0.351	1	0.365	0.365	1	12312444	4.32167e+06	7.99078e+06	64.9	1	0	5	1	1	0.55	0
113	3	4500000	1500	3750000	398	19900000	3699552	1500000	3600000	36949552	3639	1213	0.97	0.229	0.222	1	0.352	0.352	0.97	36949552	8.2028e+06	2.87468e+07	77.8	0	0	4	1	1	0.62	0
114	1.5	2250000	900	2250000	232	11600000	867082	1800000	1800000	2.05671e+07	1968	1312	0.936	0.227	0.212	0.938	0.23	0.215	0.997868	2.05671e+07	4.36022e+06	1.62069e+07	78.8	0	0	4	1	1	0.69	0
115	2	3000000	1200	3000000	278	13900000	1541480	400000	200000	22041480	2644	1322	1	0.907	0.907	1	0.922	0.922	1	22041480	1.99916e+07	2.04986e+06	9.3	1	1	10	1	1	0.74	1
116	1	1500000	750	1875000	154	7700000	385370	1200000	300000	12960370	1421	1421	1	0.396	0.396	1	0.411	0.411	1	12960370	5.13231e+06	7.82806e+06	60.4	1	0	5	1	1	0.59	0
117	2	3000000	1300	3250000	287	14350000	2158072	2400000	600000	25758072	2780	1390	0.996	0.324	0.323	1	0.361	0.361	0.996	25758072	8.31986e+06	1.74382e+07	67.7	1	0	5	1	1	0.49	0
118	1	1500000	600	1500000	132	6600000	462444	200000	200000	10462444	1230	1230	0.988	0.885	0.874	1	0.921	0.921	0.988	10462444	9.14418e+06	1.31827e+06	12.6	1	1	9	1	1	0.69	1
119	1	1500000	500	1250000	120	6000000	462444	400000	600000	10212444	1012	1012	0.83	0.425	0.352	1	0.379	0.379	0.83	10212444	3.59478e+06	6.61766e+06	64.8	0	0	4	1	1	0.24	0
120	2	3000000	1200	3000000	285	14250000	2158072	200000	600000	23208072	2690	1345	1	0.639	0.639	1	0.671	0.671	1	23208072	1.483e+07	8.37811e+06	36.1	1	1	7	1	1	0.57	1
121	1.5	2250000	800	2000000	143	7150000	1040499	150000	450000	13040499	1470	980	1	0.573	0.573	1	0.594	0.594	1	13040499	7.47221e+06	5.56829e+06	42.7	1	1	7	1	1	0.7	1
122	2	3000000	1200	3000000	287	14350000	1849776	200000	800000	23199776	2600	1300	0.987	0.595	0.587	1	0.587	0.587	0.987	23199776	1.36183e+07	9.58151e+06	41.3	1	1	6	1	1	0.47	1
123	2.5	3750000	1600	4000000	365	18250000	3468330	500000	750000	30718330	3380	1352	0.97	0.532	0.516	1	0.757	0.757	0.97	30718330	1.58507e+07	1.48677e+07	48.4	1	1	7	1	1	0.52	1
124	2	3000000	1000	2500000	254	12700000	1695628	200000	1000000	21095628	2200	1100	0.959	0.478	0.458	0.96	0.481	0.462	0.998958	21095628	9.6618e+06	1.14338e+07	54.2	1	0	5	1	1	0.26	0
125	1	1500000	300	750000	89	4450000	308296	300000	400000	7708296	950	950	1	0.48	0.48	1	0.52	0.52	1	7708296	3.69998e+06	4.00831e+06	52	1	1	6	1	1	0.72	1
126	1	1500000	400	1000000	88	4400000	308296	300000	600000	8108296	750	750	0.798	0.374	0.298	1	0.336	0.336	0.798	8108296	2.41627e+06	5.69202e+06	70.2	0	0	3	1	1	0.5	0
127	2	3000000	1200	3000000	295	14750000	2466368	800000	1200000	25216368	2624	1312	0.947	0.378	0.358	0.964	0.371	0.358	0.982365	25216368	9.02746e+06	1.61889e+07	64.2	1	0	3	1	1	0.42	0
128	2	3000000	1500	3750000	285	14250000	2466368	800000	1200000	25466368	3000	1500	1	0.41	0.41	1	0.517	0.517	1	25466368	1.04412e+07	1.50252e+07	59	1	1	5	1	1	0.58	1
129	1.5	2250000	750	1875000	168	8400000	924888	300000	450000	14199888	1500	1000	0.862	0.634	0.546	0.863	0.655	0.565	0.998841	14199888	7.75314e+06	6.44675e+06	45.4	1	1	5	0	0	0.35	1
130	2	3000000	1000	2500000	156	7800000	1233184	400000	600000	15533184	1500	750	0.907	0.452	0.41	0.91	0.466	0.424	0.996703	15533184	6.36861e+06	9.16458e+06	59	1	1	6	1	1	0.61	1
131	1	1500000	600	1500000	125	6250000	385370	300000	300000	10235370	1000	1000	0.8	0.697	0.557	1	0.601	0.601	0.8	10235370	5.7011e+06	4.53427e+06	44.3	1	1	5	1	1	0.52	1
132	2	3000000	1200	3000000	187	9350000	1541480	400000	2000000	19291480	1800	900	0.91	0.257	0.234	0.911	0.262	0.239	0.998902	19291480	4.51421e+06	1.47773e+07	76.6	0	0	4	1	1	0.5	0
133	2	3000000	800	2000000	150	7500000	1233184	600000	2400000	16733184	1300	650	0.812	0.181	0.147	0.816	0.188	0.154	0.995098	16733184	2.45978e+06	1.42734e+07	85.3	0	0	2	0	0	0.51	0
134	1	1500000	500	1250000	113	5650000	308296	400000	300000	9408296	950	950	0.83	0.598	0.496	1	0.539	0.539	0.83	9408296	4.66651e+06	4.74178e+06	50.4	1	1	5	1	1	0.57	1
135	1	1500000	300	750000	78	3900000	308296	200000	300000	6958296	650	650	0.786	0.546	0.429	1	0.495	0.495	0.786	6958296	2.98511e+06	3.97319e+06	57.1	1	1	5	0	0	0.43	1
136	1	1500000	600	1500000	121	6050000	385370	300000	600000	10335370	1000	1000	0.782	0.493	0.386	1	0.416	0.416	0.782	10335370	3.98945e+06	6.34592e+06	61.4	1	0	5	0	0	0.42	0
137	1	1500000	500	1250000	90	4500000	231222	100000	300000	7881222	700	700	0.833	0.68	0.566	1	0.645	0.645	0.833	7881222	4.46077e+06	3.42045e+06	43.4	1	1	5	1	1	0.32	1
138	1	1500000	300	750000	112	5600000	231222	200000	300000	8581222	550	550	0.654	0.586	0.383	1	0.49	0.49	0.654	8581222	3.28661e+06	5.29461e+06	61.7	0	0	4	0	0	0.35	0
139	1.5	2250000	750	1875000	145	7250000	693666	450000	450000	12968666	990	660	0.646	0.546	0.352	0.667	0.57	0.38	0.968516	12968666	4.56497e+06	8.4037e+06	64.8	0	0	4	0	0	0.25	0
140	1	1500000	600	1500000	120	6000000	385370	200000	500000	10085370	1100	1100	0.869	0.595	0.517	1	0.551	0.551	0.869	10085370	5.21414e+06	4.87123e+06	48.3	1	1	5	1	1	0.46	1
141	1	1500000	300	750000	78	3900000	308296	200000	400000	7058296	500	500	0.604	0.464	0.281	1	0.395	0.395	0.604	7058296	1.98338e+06	5.07491e+06	71.9	0	0	3	0	0	0.21	0
142	3	4500000	1500	3750000	457	22850000	3468330	300000	1800000	36668330	2400	800	0.695	0.386	0.268	0.699	0.385	0.269	0.994278	36668330	9.82711e+06	2.68412e+07	73.2	0	0	3	0	0	0.18	0
143	1	1500000	300	750000	89	4450000	231222	200000	1200000	8331222	650	650	0.773	0.22	0.17	1	0.196	0.196	0.773	8331222	1.41631e+06	6.91491e+06	83	0	0	3	0	0	0.08	0
144	1	1500000	600	1500000	123	6150000	385370	200000	200000	9935370	1000	1000	0.859	0.877	0.753	1	0.812	0.812	0.859	9935370	7.48133e+06	2.45404e+06	24.7	1	1	5	1	1	0.41	1
145	1	1500000	400	1000000	112	5600000	466667	400000	600000	9.56667e+06	550	550	0.499	0.384	0.191	1	0.245	0.245	0.499	9.56667e+06	1.82723e+06	7.73943e+06	80.9	0	0	2	0	0	0.15	0
146	1	1500000	600	1500000	125	6250000	256000	600000	1200000	11306000	950	950	0.723	0.282	0.204	1	0.221	0.221	0.723	11306000	2306424	8999576	79.6	0	0	3	0	0	0.42	0
147	2	3000000	1000	2500000	240	12000000	740000	400000	400000	19040000	1700	850	0.756	0.857	0.648	0.757	0.878	0.664	0.998679	19040000	12337920	6702080	35.2	1	1	5	0	0	0.34	1
148	2	3000000	1200	3000000	190	9500000	700000	800000	1200000	18200000	1740	870	0.86	0.367	0.316	0.866	0.373	0.323	0.993072	18200000	5751200	12448800	68.4	0	0	4	1	1	0.58	0
149	1	1500000	600	1500000	132	6600000	350000	400000	800000	11150000	925	925	0.689	0.408	0.281	1	0.306	0.306	0.689	11150000	3133150	8016850	71.9	0	0	4	0	0	0.43	0
150	2	3000000	1300	3250000	285	14250000	699132	800000	1600000	23599132	2230	1115	0.788	0.43	0.339	0.789	0.433	0.342	0.998733	23599132	8.00011e+06	1.5599e+07	66.1	0	0	4	0	0	0.43	0
151	1	1500000	300	750000	121	6050000	491667	400000	800000	9.99167e+06	600	600	0.632	0.277	0.175	1	0.205	0.205	0.632	9.99167e+06	1.74854e+06	8243125	82.5	0	0	2	0	0	0.28	0
152	2	3000000	800	2000000	257	12850000	1140000	800000	1600000	21390000	1300	650	0.584	0.317	0.185	0.592	0.327	0.194	0.986486	21390000	3957150	17432850	81.5	0	0	2	0	0	0.23	0
153	2	3000000	1200	3000000	240	12000000	813333	800000	1200000	2.08133e+07	1950	975	0.769	0.451	0.346	0.769	0.458	0.352	1	2.08133e+07	7.20141e+06	1.36119e+07	65.4	0	0	3	0	0	0.41	0
154	1	1500000	400	1000000	85	4250000	406667	400000	600000	8.15667e+06	600	600	0.661	0.322	0.213	1	0.25	0.25	0.661	8.15667e+06	1737370	6.4193e+06	78.7	0	0	2	0	0	0.3	0
155	1.5	2250000	900	2250000	185	9250000	232500	900000	1500000	16382500	1335	890	0.731	0.303	0.221	0.738	0.314	0.231	0.990515	16382500	3.62053e+06	1.2762e+07	77.9	0	0	3	1	1	0.36	0
156	2	3000000	1200	3000000	298	14900000	701333	400000	800000	2.28013e+07	2242	1121	0.821	0.748	0.614	0.828	0.748	0.619	0.991546	2.28013e+07	1.4e+07	8.80131e+06	38.6	1	1	5	1	1	0.46	1
157	1	1500000	600	1500000	98	4900000	363945	2400000	800000	11463945	850	850	0.815	0.143	0.116	1	0.128	0.128	0.815	11463945	1.32982e+06	1.01341e+07	88.4	0	0	3	1	1	0.46	0
158	1.5	2250000	1000	2500000	198	9900000	310500	1500000	3600000	20060500	1500	1000	0.747	0.156	0.116	0.761	0.158	0.12	0.981603	20060500	2327018	17733482	88.4	0	0	3	0	0	0.39	0
159	2	3000000	1000	2500000	154	7700000	607410	4800000	4800000	23407410	1260	630	0.767	0.071	0.055	0.77	0.075	0.058	0.996104	23407410	1.28741e+06	2.212e+07	94.5	0	0	2	0	0	0.44	0
160	1	1500000	600	1500000	132	6600000	300000	400000	200000	10500000	500	500	0.403	0.756	0.305	1	0.429	0.429	0.403	10500000	3202500	7297500	69.5	0	0	3	0	0	0.24	0
161	2	3000000	1200	3000000	240	12000000	1123120	4800000	1200000	25123120	1960	980	0.772	0.182	0.141	0.773	0.185	0.143	0.998706	25123120	3.54236e+06	2.15808e+07	85.9	0	0	2	0	0	0.45	0
162	3	4500000	1400	3500000	487	24350000	735000	7200000	1800000	42085000	1800	600	0.492	0.183	0.09	0.505	0.183	0.092	0.974257	42085000	3787650	38297350	91	0	0	2	0	0	0.15	0
163	2	3000000	1200	3000000	253	12650000	400000	800000	800000	20650000	1200	600	0.48	0.604	0.29	0.5	0.612	0.306	0.96	20650000	5988500	14661500	71	0	0	3	0	0	0.28	0
164	2	3000000	1000	2500000	186	9300000	604920	1600000	2400000	19404920	1560	780	0.787	0.194	0.153	0.792	0.199	0.158	0.993687	19404920	2.96895e+06	1.6436e+07	84.7	0	0	2	0	0	0.47	0
165	2	3000000	1200	3000000	245	12250000	480000	400000	1200000	20330000	1952	976	0.781	0.557	0.435	0.787	0.562	0.442	0.992376	20330000	8843550	11486450	56.5	1	0	3	0	0	0.33	0
166	2	3000000	900	2250000	185	9250000	970760	400000	1200000	17070760	1160	580	0.592	0.392	0.232	0.594	0.415	0.246	0.996633	17070760	3.96042e+06	1.31103e+07	76.8	0	0	3	0	0	0.29	0
167	2	3000000	1200	3000000	190	9500000	921928	400000	1600000	18421928	1800	900	0.896	0.335	0.3	0.896	0.342	0.306	1	18421928	5.52658e+06	1.28953e+07	70	0	0	3	1	1	0.59	0
168	3	4500000	1800	4500000	485	24250000	729000	1200000	1800000	36979000	3375	1125	0.796	0.534	0.425	0.852	0.732	0.623	0.934272	36979000	15716075	21262925	57.5	1	0	3	1	1	0.42	0
169	1.5	2250000	1000	2500000	210	10500000	255783	300000	1500000	17305783	1500	1000	0.752	0.411	0.309	0.755	0.423	0.32	0.996026	17305783	5.34749e+06	1.19583e+07	69.1	0	0	3	0	0	0.3	0
170	2	3000000	1200	3000000	221	11050000	165000	1200000	1600000	20015000	1900	950	0.912	0.305	0.278	0.917	0.309	0.283	0.994547	20015000	5.56417e+06	14450830	72.2	0	0	3	1	1	0.31	0
171	2	3000000	1000	2500000	223	11150000	900000	1200000	2400000	21150000	1720	860	0.728	0.243	0.177	0.733	0.248	0.181	0.993179	21150000	3743550	17406450	82.3	0	0	3	0	0	0.41	0
172	2	3000000	1000	2500000	243	12150000	1065000	1600000	2400000	22715000	1758	879	0.717	0.229	0.165	0.718	0.235	0.168	0.998607	22715000	3747975	18967025	83.5	0	0	2	0	0	0.45	0
173	2	3000000	1200	3000000	298	14900000	336000	1600000	2400000	25236000	2000	1000	0.72	0.28	0.201	0.728	0.281	0.204	0.989011	25236000	5072436	20163564	79.9	0	0	2	0	0	0.27	0
174	2	3000000	600	1500000	158	7900000	573333	800000	1200000	1.49733e+07	1200	600	0.712	0.313	0.223	0.719	0.327	0.235	0.990264	1.49733e+07	3.33905e+06	11634280	77.7	0	0	2	0	0	0.38	0
175	1.5	2250000	800	2000000	147	7350000	516000	900000	1800000	14816000	1125	750	0.719	0.22	0.158	0.721	0.233	0.168	0.997226	14816000	2340928	12475072	84.2	0	0	2	0	0	0.36	0
176	3	4500000	1500	3750000	385	19250000	516000	600000	1800000	30416000	2670	890	0.771	0.531	0.409	0.791	0.536	0.424	0.974716	30416000	12440144	17975856	59.1	0	1	2	0	0	0.26	1
177	1	1500000	500	1250000	145	7250000	570000	400000	600000	11570000	1125	1125	0.882	0.428	0.377	1	0.401	0.401	0.882	11570000	4361890	7208110	62.3	1	0	2	1	1	0.58	0
178	2	3000000	1200	3000000	355	17750000	720000	1200000	1200000	26870000	2624	1312	0.914	0.453	0.414	0.963	0.431	0.414	0.949117	26870000	11124180	15745820	58.6	1	0	3	1	1	0.51	0
179	2	3000000	1400	3500000	356	17800000	340000	800000	2000000	27440000	1400	700	0.461	0.418	0.192	0.5	0.401	0.2	0.922	27440000	5268480	22171520	80.8	0	0	2	0	0	0.26	0
180	1	1500000	650	1625000	180	9000000	142500	400000	800000	13467500	1375	1375	0.94	0.476	0.447	1	0.466	0.466	0.94	13467500	6.01997e+06	7.44753e+06	55.3	1	1	0	1	1	0.41	1
181	1	1500000	700	1750000	198	9900000	268500	200000	1200000	14818500	1600	1600	1	0.413	0.413	1	0.426	0.426	1	14818500	6.12004e+06	8.69846e+06	58.7	1	1	5	1	1	0.48	1
182	2	3000000	1200	3000000	324	16200000	330000	800000	4800000	28130000	2600	1300	0.919	0.192	0.177	0.953	0.185	0.177	0.964323	28130000	4979010	23150990	82.3	0	0	3	1	1	0.23	0
183	2	3000000	1000	2500000	325	16250000	270000	800000	800000	23620000	2316	1158	0.939	0.616	0.578	0.943	0.617	0.582	0.995758	23620000	1.36524e+07	9.96764e+06	42.2	1	1	7	1	1	0.49	1
184	1.5	2250000	1000	2500000	289	14450000	700000	600000	900000	21400000	2077	1384.67	0.896	0.538	0.481	0.933	0.522	0.487	0.960343	21400000	10293400	11106600	51.9	1	1	5	1	1	0.55	1
185	1	1500000	500	1250000	120	6000000	256000	600000	1200000	10806000	1000	1000	0.821	0.262	0.215	1	0.231	0.231	0.821	10806000	2323290	8482710	78.5	0	0	4	1	1	0.52	0
186	2	3000000	1200	3000000	289	14450000	740000	400000	400000	21990000	2500	1250	1	0.953	0.953	1	0.955	0.955	1	21990000	20956470	1033530	4.7	1	1	10	1	1	0.58	1
187	2	3000000	1000	2500000	278	13900000	700000	800000	1200000	22100000	2000	1000	0.791	0.459	0.363	0.807	0.456	0.368	0.980173	22100000	8022300	14077700	63.7	0	0	3	0	0	0.51	0
188	2	3000000	1000	2500000	267	13350000	700000	800000	1600000	21950000	2116	1058	0.845	0.381	0.322	0.857	0.38	0.325	0.985998	21950000	7067900	14882100	67.8	0	0	3	0	0	0.59	0
189	1	1500000	600	1500000	145	7250000	349566	400000	800000	11799566	1380	1380	1	0.42	0.42	1	0.437	0.437	1	11799566	4.95582e+06	6.84375e+06	58	1	0	5	1	1	0.64	0
190	3	4500000	1500	3750000	398	19900000	1475000	1200000	2400000	33225000	3639	1213	0.97	0.364	0.353	1	0.56	0.56	0.97	33225000	11728425	21496575	64.7	1	0	5	1	1	0.62	0
191	1.5	2250000	900	2250000	232	11600000	855000	600000	1200000	18755000	1968	1312	0.936	0.399	0.373	0.938	0.404	0.379	0.997868	18755000	6995615	11759385	62.7	1	0	5	1	1	0.59	0
192	2	3000000	1200	3000000	278	13900000	813333	800000	1200000	2.27133e+07	2644	1322	0.97	0.484	0.47	0.981	0.487	0.477	0.988787	2.27133e+07	1.06753e+07	1.20381e+07	53	1	0	6	1	1	0.61	0
193	1	1500000	750	1875000	154	7700000	406667	400000	600000	1.24817e+07	1421	1421	0.934	0.54	0.505	1	0.525	0.525	0.934	1.24817e+07	6.30324e+06	6.17843e+06	49.5	1	1	6	1	1	0.57	1
194	2	3000000	1300	3250000	287	14350000	310000	1200000	2000000	24110000	2780	1390	1	0.346	0.346	1	0.386	0.386	1	24110000	8.34206e+06	15767940	65.4	1	0	5	1	1	0.63	0
195	1	1500000	600	1500000	132	6600000	350667	200000	400000	1.05507e+07	1230	1230	0.931	0.724	0.674	1	0.71	0.71	0.931	1.05507e+07	7.11115e+06	3.43952e+06	32.6	1	1	7	1	1	0.57	1
196	1	1500000	500	1250000	120	6000000	363945	2400000	800000	12313945	1012	1012	0.829	0.167	0.139	1	0.149	0.149	0.829	12313945	1.71164e+06	1.06023e+07	86.1	0	0	3	1	1	0.47	0
197	2	3000000	1200	3000000	285	14250000	573333	800000	1200000	2.28233e+07	2690	1345	0.98	0.51	0.5	0.995	0.528	0.525	0.984925	2.28233e+07	1.14117e+07	1.14117e+07	50	1	1	6	1	1	0.65	1
198	1.5	2250000	800	2000000	143	7150000	404000	600000	900000	13304000	1470	980	0.968	0.379	0.367	0.97	0.392	0.38	0.997938	13304000	4882568	8421432	63.3	1	0	5	1	1	0.54	0
199	2	3000000	1200	3000000	287	14350000	700000	1200000	1200000	23450000	2600	1300	0.945	0.436	0.412	0.959	0.43	0.412	0.985401	23450000	9661400	13788600	58.8	1	1	6	1	1	0.68	1
200	2.5	3750000	1600	4000000	365	18250000	475000	1000000	5000000	32475000	3380	1352	0.957	0.224	0.214	1	0.314	0.314	0.957	32475000	6949650	25525350	78.6	0	0	4	1	1	0.6	0
201	2	3000000	1000	2500000	254	12700000	470000	1200000	4800000	24670000	2200	1100	0.888	0.158	0.14	0.897	0.158	0.142	0.989967	24670000	3453800	21216200	86	0	0	2	0	0	0.45	0
202	1	1500000	300	750000	89	4450000	342667	800000	600000	8.44267e+06	950	950	1	0.268	0.268	1	0.291	0.291	1	8.44267e+06	2.26263e+06	6.18003e+06	73.2	0	0	4	1	1	0.72	0
203	1	1500000	400	1000000	88	4400000	163500	400000	600000	8063500	750	750	0.824	0.355	0.292	1	0.329	0.329	0.824	8063500	2354542	5708958	70.8	0	0	8	1	1	0.56	0
204	2	3000000	1200	3000000	295	14750000	583333	1200000	2400000	2.49333e+07	2624	1312	0.947	0.295	0.28	0.964	0.29	0.28	0.982365	2.49333e+07	6.98133e+06	17952000	72	0	0	5	1	1	0.69	0
205	2	3000000	1500	3750000	285	14250000	688000	400000	1200000	23288000	3000	1500	1	0.638	0.638	1	0.806	0.806	1	23288000	14857744	8430256	36.2	1	1	8	1	1	0.61	1
206	1.5	2250000	750	1875000	168	8400000	258000	600000	900000	14283000	1500	1000	0.886	0.439	0.389	0.89	0.452	0.402	0.995506	14283000	5556087	8726913	61.1	0	0	4	0	0	0.44	0
207	2	3000000	1200	3000000	287	14350000	760000	1200000	1200000	23510000	2630	1315	0.956	0.432	0.413	0.971	0.427	0.415	0.984552	23510000	9709630	13800370	58.7	1	0	5	1	1	0.66	0
208	2	3000000	1000	2500000	240	12000000	720000	800000	2000000	21020000	2444	1222	1	0.319	0.319	1	0.32	0.32	1	21020000	6705380	14314620	68.1	1	0	5	1	1	0.7	0
209	1	1500000	600	1500000	167	8350000	170000	400000	800000	12720000	1325	1325	0.941	0.454	0.427	1	0.446	0.446	0.941	12720000	5431440	7288560	57.3	1	1	6	1	1	0.61	1
210	1	1500000	600	1500000	134	6700000	142500	200000	1200000	11242500	1288	1288	1	0.344	0.344	1	0.361	0.361	1	11242500	3867420	7375080	65.6	1	0	5	1	1	0.43	0
211	2	3000000	1200	3000000	240	12000000	537000	800000	4800000	24137000	2300	1150	0.908	0.17	0.154	0.909	0.171	0.155	0.9989	24137000	3717098	20419902	84.6	0	0	4	1	1	0.31	0
212	1.5	2250000	900	2250000	261	13050000	247500	600000	600000	18997500	2025	1350	0.97	0.685	0.664	0.974	0.691	0.673	0.995893	18997500	12614340	6383160	33.6	1	1	7	1	1	0.36	1
213	1	1500000	700	1750000	189	9450000	180000	400000	400000	13680000	1547	1547	1	0.755	0.755	1	0.78	0.78	1	13680000	10328400	3351600	24.5	1	1	8	1	1	0.55	1
214	2	3000000	1200	3000000	287	14350000	720000	800000	400000	22270000	2668	1334	1	0.784	0.784	1	0.811	0.811	1	22270000	17459680	4810320	21.6	1	1	8	1	1	0.6	1
215	2	3000000	1200	3000000	265	13250000	390000	800000	800000	21240000	2460	1230	0.95	0.627	0.596	0.953	0.627	0.598	0.996852	21240000	12659040	8580960	40.4	1	1	7	1	1	0.38	1
216	1	1500000	400	1000000	123	6150000	233000	200000	200000	9283000	1000	1000	1	0.854	0.854	1	0.92	0.92	1	9283000	7927682	1355318	14.6	1	1	9	1	1	0.6	1
217	1.5	2250000	1000	2500000	231	11550000	531000	600000	600000	18031000	2031	1354	0.936	0.649	0.608	0.936	0.658	0.616	1	18031000	10962848	7068152	39.2	1	1	7	1	1	0.59	1
218	2	3000000	1200	3000000	287	14350000	477000	800000	400000	22027000	2624	1312	1	0.832	0.832	1	0.832	0.832	1	22027000	18326464	3700536	16.8	1	1	9	1	1	0.39	1
219	1	1500000	600	1500000	145	7250000	166000	400000	400000	11216000	1232	1232	0.893	0.678	0.605	1	0.638	0.638	0.893	11216000	6785680	4430320	39.5	1	1	6	1	1	0.2	1
220	2	3000000	800	2000000	198	9900000	537000	800000	800000	17037000	1960	980	0.937	0.489	0.458	0.991	0.47	0.465	0.94551	17037000	7802946	9234054	54.2	1	1	6	1	1	0.58	1
221	1	1500000	300	750000	90	4500000	202500	400000	400000	7752500	950	950	1	0.458	0.458	1	0.498	0.498	1	7752500	3550645	4201855	54.2	1	1	6	1	1	0.44	1
222	1	1500000	500	1250000	92	4600000	166667	600000	400000	8.51667e+06	900	900	0.945	0.391	0.37	1	0.404	0.404	0.945	8.51667e+06	3.15117e+06	5365500	63	1	0	5	1	1	0.26	0
223	2	3000000	1200	3000000	247	12350000	220000	4800000	4800000	28170000	1000	500	0.424	0.104	0.044	0.5	0.095	0.048	0.848	28170000	1239480	26930520	95.6	0	0	2	0	0	0.12	0
224	1	1500000	700	1750000	152	7600000	160000	400000	400000	11810000	1243	1243	0.877	0.699	0.613	1	0.645	0.645	0.877	11810000	7239530	4570470	38.7	1	1	5	1	1	0.27	1
225	2	3000000	900	2250000	198	9900000	525000	800000	800000	17275000	1300	650	0.621	0.49	0.305	0.622	0.514	0.319	0.998392	17275000	5268875	12006125	69.5	0	0	4	0	0	0.22	0
226	1	1500000	600	1500000	120	6000000	60000	400000	400000	9860000	1000	1000	0.905	0.574	0.519	1	0.56	0.56	0.905	9860000	5117340	4742660	48.1	1	1	6	1	1	0.3	1
227	1	1500000	500	1250000	120	6000000	105000	400000	400000	9655000	1000	1000	0.875	0.58	0.507	1	0.547	0.547	0.875	9655000	4895085	4759915	49.3	1	1	5	1	1	0.32	1
228	2	3000000	1200	3000000	289	14450000	220000	800000	800000	22270000	2500	1250	0.939	0.673	0.632	0.953	0.665	0.634	0.98531	22270000	14074640	8195360	36.8	1	1	7	1	1	0.39	1
229	2	3000000	1000	2500000	278	13900000	330000	800000	1200000	21730000	2000	1000	0.801	0.487	0.39	0.807	0.49	0.395	0.992565	21730000	8474700	13255300	61	0	0	5	0	0	0.37	0
230	2	3000000	1000	2500000	267	13350000	260000	800000	800000	20710000	2116	1058	0.86	0.616	0.53	0.862	0.621	0.536	0.99768	20710000	10976300	9733700	47	1	1	5	0	0	0.15	1
231	1	1500000	600	1500000	145	7250000	165000	400000	400000	11215000	1380	1380	1	0.679	0.679	1	0.707	0.707	1	11215000	7.61499e+06	3600015	32.1	1	1	7	1	1	0.64	1
232	3	4500000	1500	3750000	398	19900000	170000	1200000	1200000	30720000	3639	1213	1	0.631	0.631	1	1	1	1	30720000	19384320	11335680	36.9	1	1	7	1	1	0.41	1
233	1.5	2250000	900	2250000	232	11600000	261000	600000	600000	17561000	1968	1312	0.945	0.68	0.642	0.953	0.685	0.652	0.991605	17561000	11274162	6286838	35.8	1	1	7	1	1	0.44	1
234	2	3000000	1200	3000000	278	13900000	354000	400000	800000	21454000	2644	1322	1	0.803	0.803	1	0.816	0.816	1	21454000	17227562	4226438	19.7	1	1	9	1	1	0.47	1
235	1	1500000	750	1875000	154	7700000	115000	400000	400000	11990000	1421	1421	1	0.717	0.717	1	0.745	0.745	1	11990000	8596830	3393170	28.3	1	1	9	1	1	0.55	1
236	2	3000000	1300	3250000	287	14350000	464000	800000	800000	22664000	2780	1390	0.995	0.664	0.661	1	0.739	0.739	0.995	22664000	14980904	7683096	33.9	1	1	7	1	1	0.58	1
237	1	1500000	600	1500000	132	6600000	260000	400000	400000	10660000	1230	1230	0.933	0.618	0.577	1	0.608	0.608	0.933	10660000	6150820	4509180	42.3	1	1	6	1	1	0.24	1
238	1	1500000	500	1250000	120	6000000	110000	400000	200000	9460000	1012	1012	1	0.701	0.701	1	0.754	0.754	1	9460000	6631460	2828540	29.9	1	1	8	1	1	0.64	1
239	2	3000000	1200	3000000	285	14250000	345000	800000	800000	22195000	2690	1345	0.986	0.668	0.659	1	0.693	0.693	0.986	22195000	14626505	7568495	34.1	1	1	7	1	1	0.71	1
240	1.5	2250000	800	2000000	143	7150000	430000	600000	900000	13330000	1470	980	0.967	0.377	0.364	0.97	0.389	0.378	0.996907	13330000	4852120	8477880	63.6	0	0	5	1	1	0.64	0
241	2	3000000	1200	3000000	287	14350000	538667	800000	1200000	2.28887e+07	2600	1300	0.945	0.515	0.486	0.959	0.507	0.486	0.985401	2.28887e+07	1.11239e+07	1.17648e+07	51.4	1	1	6	1	1	0.52	1
242	2.5	3750000	1600	4000000	365	18250000	875000	1500000	1500000	29875000	3380	1352	0.955	0.449	0.428	1	0.629	0.629	0.955	29875000	12786500	17088500	57.2	1	1	5	1	1	0.69	1
243	2	3000000	1000	2500000	254	12700000	380000	800000	4000000	23380000	2200	1100	0.889	0.196	0.174	0.9	0.195	0.176	0.987778	23380000	4068120	19311880	82.6	0	0	4	0	0	0.53	0
244	1	1500000	300	750000	89	4450000	235000	600000	2400000	9935000	950	950	1	0.121	0.121	1	0.132	0.132	1	9935000	1202135	8732865	87.9	0	0	3	1	1	0.56	0
245	1	1500000	400	1000000	88	4400000	342667	800000	600000	8.64267e+06	750	750	0.798	0.265	0.211	1	0.238	0.238	0.798	8.64267e+06	1.8236e+06	6.81906e+06	78.9	0	0	3	0	0	0.52	0
246	2	3000000	1200	3000000	295	14750000	327000	800000	1200000	23077000	2624	1312	0.948	0.54	0.512	0.965	0.53	0.512	0.982383	23077000	11815424	11261576	48.8	1	1	6	1	1	0.69	1
247	2	3000000	1500	3750000	285	14250000	583333	1200000	2400000	2.51833e+07	3000	1500	1	0.32	0.32	1	0.404	0.404	1	2.51833e+07	8.05867e+06	1.71247e+07	68	1	0	5	1	1	0.74	0
248	1.5	2250000	750	1875000	168	8400000	516000	300000	900000	14241000	1500	1000	0.85	0.501	0.425	0.852	0.517	0.44	0.997653	14241000	6052425	8188575	57.5	0	1	4	0	0	0.46	1
249	2	3000000	1000	2500000	156	7800000	344000	800000	1200000	15644000	1500	750	0.91	0.32	0.291	0.911	0.331	0.302	0.998902	15644000	4552404	11091596	70.9	1	0	4	1	1	0.46	0
250	1	1500000	600	1500000	125	6250000	380000	600000	600000	10830000	1000	1000	0.759	0.414	0.314	1	0.338	0.338	0.759	10830000	3400620	7429380	68.6	1	0	4	0	0	0.46	0
251	2	3000000	1200	3000000	187	9350000	720000	800000	2000000	18870000	1800	900	0.903	0.26	0.235	0.911	0.263	0.24	0.991218	18870000	4434450	14435550	76.5	0	0	4	1	1	0.6	0
252	2	3000000	800	2000000	150	7500000	340000	800000	1600000	15240000	1300	650	0.819	0.256	0.209	0.819	0.268	0.219	1	15240000	3185160	12054840	79.1	0	0	3	0	0	0.49	0
253	1	1500000	500	1250000	113	5650000	142500	200000	1200000	9942500	950	950	0.861	0.295	0.254	1	0.276	0.276	0.861	9942500	2525395	7417105	74.6	0	0	3	1	1	0.29	0
254	1	1500000	300	750000	78	3900000	268500	400000	2400000	9218500	650	650	0.781	0.112	0.087	1	0.1	0.1	0.781	9218500	802010	8.41649e+06	91.3	0	0	2	0	0	0.18	0
255	1	1500000	600	1500000	121	6050000	165000	400000	400000	10015000	1000	1000	0.84	0.585	0.492	1	0.53	0.53	0.84	10015000	4927380	5087620	50.8	1	1	4	1	1	0.23	1
256	1	1500000	500	1250000	90	4500000	180000	400000	400000	8230000	700	700	0.74	0.462	0.342	1	0.389	0.389	0.74	8230000	2814660	5415340	65.8	0	0	3	0	0	0.29	0
257	1	1500000	300	750000	112	5600000	360000	400000	200000	8810000	550	550	0.591	0.547	0.323	1	0.414	0.414	0.591	8810000	2845630	5964370	67.7	0	0	4	0	0	0.19	0
258	1.5	2250000	750	1875000	145	7250000	292500	600000	600000	12867500	990	660	0.651	0.491	0.32	0.667	0.518	0.345	0.976012	12867500	4117600	8749900	68	0	0	5	0	0	0.08	0
259	1	1500000	600	1500000	120	6000000	233000	200000	200000	9633000	1100	1100	1	0.939	0.939	1	1	1	1	9633000	9045387	587613	6.1	1	1	10	1	1	0.6	1
260	1	1500000	300	750000	78	3900000	354000	400000	400000	7304000	500	500	0.601	0.374	0.224	1	0.316	0.316	0.601	7304000	1636096	5667904	77.6	0	0	3	0	0	0.25	0
261	3	4500000	1500	3750000	457	22850000	715500	1200000	600000	33615500	2400	800	0.691	0.734	0.507	0.703	0.725	0.51	0.98293	33615500	1.70431e+07	1.65724e+07	49.3	1	1	4	0	0	0.08	1
262	1	1500000	300	750000	89	4450000	166000	400000	400000	7666000	650	650	0.721	0.443	0.319	1	0.369	0.369	0.721	7666000	2445454	5220546	68.1	0	0	4	0	0	0.03	0
263	1	1500000	600	1500000	123	6150000	268500	400000	400000	10218500	1000	1000	0.799	0.585	0.467	1	0.504	0.504	0.799	10218500	4.77204e+06	5.44646e+06	53.3	1	0	4	1	1	0.44	0
264	1	1500000	400	1000000	112	5600000	202500	400000	400000	9102500	550	550	0.501	0.53	0.265	1	0.339	0.339	0.501	9102500	2.41216e+06	6.69034e+06	73.5	0	0	3	0	0	0.22	0
265	1	1500000	600	1500000	125	6250000	166667	600000	400000	1.04167e+07	950	950	0.777	0.502	0.39	1	0.423	0.423	0.777	1.04167e+07	4062500	6.35417e+06	61	0	0	3	0	0	0.09	0
266	2	3000000	1000	2500000	240	12000000	220000	4800000	4800000	27320000	1700	850	0.741	0.102	0.075	0.744	0.104	0.077	0.995968	27320000	2049000	25271000	92.5	0	0	2	0	0	0.14	0
267	2	3000000	1200	3000000	190	9500000	320000	800000	800000	17420000	1740	870	0.894	0.48	0.429	0.9	0.488	0.439	0.993333	17420000	7473180	9946820	57.1	0	0	3	1	1	0.28	0
268	1	1500000	600	1500000	132	6600000	262500	400000	400000	10662500	925	925	0.701	0.618	0.434	1	0.472	0.472	0.701	10662500	4627525	6034975	56.6	0	0	5	0	0	0.3	0
269	2	3000000	1300	3250000	285	14250000	120000	800000	800000	22220000	2230	1115	0.91	0.636	0.579	0.953	0.613	0.584	0.954879	22220000	12865380	9354620	42.1	1	1	6	1	1	0.3	1
270	1	1500000	300	750000	121	6050000	105000	400000	400000	9205000	600	600	0.73	0.417	0.304	1	0.357	0.357	0.73	9205000	2798320	6406680	69.6	0	0	3	0	0	0.17	0
271	2	3000000	800	2000000	257	12850000	220000	800000	800000	19670000	1300	650	0.616	0.534	0.329	0.672	0.512	0.344	0.916667	19670000	6471430	13198570	67.1	0	0	3	0	0	0.07	0
272	2	3000000	1200	3000000	240	12000000	330000	800000	1200000	20330000	1950	975	0.815	0.466	0.38	0.818	0.472	0.386	0.996333	20330000	7725400	12604600	62	0	0	3	0	0	0.39	0
273	1	1500000	400	1000000	85	4250000	130000	400000	400000	7680000	600	600	0.699	0.43	0.3	1	0.352	0.352	0.699	7680000	2304000	5376000	70	0	0	3	0	0	0.34	0
274	1.5	2250000	900	2250000	185	9250000	247500	600000	600000	15197500	1335	890	0.736	0.594	0.438	0.74	0.618	0.457	0.994595	15197500	6656505	8540995	56.2	0	0	4	0	0	0.38	0
275	2	3000000	1200	3000000	298	14900000	113333	800000	800000	2.26133e+07	2242	1121	0.924	0.631	0.583	0.986	0.596	0.588	0.93712	2.26133e+07	1.31836e+07	9.42976e+06	41.7	1	1	7	1	1	0.33	1
276	1	1500000	600	1500000	98	4900000	174000	400000	400000	8874000	850	850	0.84	0.495	0.416	1	0.459	0.459	0.84	8874000	3691584	5182416	58.4	1	1	5	1	1	0.33	1
277	1.5	2250000	1000	2500000	198	9900000	265500	300000	600000	15815500	1500	1000	0.79	0.769	0.607	0.875	0.718	0.629	0.902857	15815500	9.60001e+06	6.21549e+06	39.3	1	1	6	0	0	0.26	1
278	2	3000000	1000	2500000	154	7700000	230000	800000	800000	15030000	1260	630	0.812	0.391	0.318	0.821	0.407	0.334	0.989038	15030000	4779540	10250460	68.2	0	0	4	1	1	0.36	0
279	1	1500000	600	1500000	125	6250000	232000	400000	400000	10282000	950	950	0.759	0.595	0.452	1	0.49	0.49	0.759	10282000	4647464	5634536	54.8	0	1	4	0	0	0.34	1
280	2	3000000	1000	2500000	240	12000000	520000	800000	800000	19620000	1700	850	0.699	0.571	0.399	0.704	0.581	0.409	0.992898	19620000	7828380	11791620	60.1	0	0	4	0	0	0.01	0
281	2	3000000	1200	3000000	190	9500000	220000	800000	400000	16920000	1740	870	0.994	0.606	0.602	0.994	0.62	0.617	1	16920000	10185840	6734160	39.8	1	1	7	1	1	0.63	1
282	1	1500000	600	1500000	132	6600000	172500	400000	400000	10572500	925	925	0.722	0.628	0.453	1	0.494	0.494	0.722	10572500	4.78934e+06	5.78316e+06	54.7	1	0	4	0	0	0.44	0
283	2	3000000	1300	3250000	285	14250000	414000	2000000	4800000	27714000	2230	1115	0.79	0.164	0.13	0.793	0.165	0.131	0.996217	27714000	3602820	24111180	87	0	0	2	0	0	0.43	0
284	1	1500000	300	750000	121	6050000	303705	2400000	2400000	13403705	600	600	0.632	0.083	0.052	1	0.061	0.061	0.632	13403705	696993	1.27067e+07	94.8	0	0	2	0	0	0.3	0
285	2	3000000	800	2000000	257	12850000	600000	800000	400000	19650000	1300	650	0.622	0.638	0.396	0.622	0.667	0.415	1	19650000	7781400	11868600	60.4	0	0	3	0	0	0.29	0
286	2	3000000	1200	3000000	240	12000000	1123120	4800000	1200000	25123120	1950	975	0.769	0.182	0.14	0.769	0.185	0.142	1	25123120	3.51724e+06	2.16059e+07	86	0	0	2	0	0	0.45	0
287	1	1500000	400	1000000	85	4250000	245000	2400000	600000	9995000	600	600	0.664	0.136	0.09	1	0.106	0.106	0.664	9995000	899550	9095450	91	0	0	2	0	0	0.32	0
288	1.5	2250000	900	2250000	185	9250000	300000	600000	600000	15250000	1335	890	0.726	0.592	0.43	0.729	0.617	0.449	0.995885	15250000	6557500	8692500	57	1	1	4	0	0	0.33	1
289	2	3000000	1200	3000000	298	14900000	604920	1600000	2400000	25504920	2242	1121	0.807	0.272	0.22	0.814	0.272	0.221	0.9914	25504920	5.61108e+06	1.98938e+07	78	0	0	3	1	1	0.49	0
290	1	1500000	600	1500000	98	4900000	240000	200000	600000	8940000	850	850	0.822	0.461	0.379	1	0.418	0.418	0.822	8940000	3388260	5551740	62.1	0	0	3	1	1	0.37	0
291	1.5	2250000	1000	2500000	198	9900000	728070	300000	900000	16578070	1500	1000	0.719	0.557	0.401	0.771	0.538	0.415	0.932555	16578070	6.64781e+06	9.93026e+06	59.9	0	1	4	0	0	0.42	1
292	2	3000000	1000	2500000	154	7700000	921928	400000	1600000	16121928	1260	630	0.771	0.272	0.21	0.771	0.286	0.22	1	16121928	3.3856e+06	1.27363e+07	79	0	0	3	1	1	0.46	0
293	1	1500000	600	1500000	132	6600000	243000	400000	600000	10843000	500	500	0.373	0.506	0.189	1	0.266	0.266	0.373	10843000	2049327	8793673	81.1	0	0	2	0	0	0.18	0
294	2	3000000	1200	3000000	240	12000000	341044	400000	2000000	20741044	1960	980	0.825	0.367	0.303	0.832	0.369	0.307	0.991587	20741044	6.28454e+06	1.44565e+07	69.7	0	0	3	0	0	0.38	0
295	3	4500000	1400	3500000	487	24350000	247500	1800000	2400000	36797500	1800	600	0.513	0.343	0.176	0.55	0.326	0.18	0.932727	36797500	6476360	30321140	82.4	0	0	2	0	0	0.21	0
296	2	3000000	1200	3000000	253	12650000	900000	1200000	2400000	23150000	1200	600	0.453	0.273	0.124	0.5	0.261	0.13	0.906	23150000	2870600	20279400	87.6	0	0	2	0	0	0.13	0
297	2	3000000	1000	2500000	186	9300000	1065000	1600000	2400000	19865000	1560	780	0.787	0.186	0.146	0.792	0.19	0.151	0.993687	19865000	2900290	16964710	85.4	0	0	3	0	0	0.52	0
298	2	3000000	1200	3000000	245	12250000	336000	1600000	2400000	22586000	1952	976	0.799	0.246	0.197	0.802	0.249	0.2	0.996259	22586000	4449442	18136558	80.3	0	0	3	0	0	0.35	0
299	2	3000000	900	2250000	185	9250000	573333	800000	1200000	1.70733e+07	1160	580	0.589	0.366	0.216	0.59	0.387	0.228	0.998305	1.70733e+07	3687840	1.33855e+07	78.4	0	0	2	0	0	0.26	0
300	2	3000000	1200	3000000	190	9500000	688000	1200000	2400000	19788000	1800	900	0.89	0.213	0.19	0.896	0.216	0.194	0.993304	19788000	3759720	16028280	81	0	0	3	1	1	0.53	0
301	3	4500000	1800	4500000	485	24250000	516000	600000	1800000	36166000	3375	1125	0.853	0.606	0.517	1	0.759	0.759	0.853	36166000	18697822	17468178	48.3	1	1	5	1	1	0.34	1
302	1.5	2250000	1000	2500000	210	10500000	855000	600000	900000	17605000	1500	1000	0.703	0.477	0.335	0.732	0.474	0.347	0.960383	17605000	5897675	11707325	66.5	0	0	3	0	0	0.4	0
303	2	3000000	1200	3000000	221	11050000	720000	1200000	1200000	20170000	1900	950	0.811	0.37	0.3	0.814	0.375	0.305	0.996314	20170000	6051000	14119000	70	0	0	4	1	1	0.41	0
304	2	3000000	1000	2500000	223	11150000	340000	800000	2000000	19790000	1720	860	0.766	0.309	0.236	0.768	0.316	0.242	0.997396	19790000	4670440	15119560	76.4	0	0	3	0	0	0.36	0
305	2	3000000	1000	2500000	243	12150000	285000	800000	1600000	20335000	1758	879	0.741	0.386	0.286	0.743	0.394	0.292	0.997308	20335000	5.81581e+06	14519190	71.4	0	0	3	0	0	0.21	0
306	2	3000000	1200	3000000	298	14900000	537000	400000	2400000	24237000	2000	1000	0.731	0.354	0.258	0.734	0.357	0.262	0.995913	24237000	6253146	17983854	74.2	0	0	3	0	0	0.21	0
307	2	3000000	600	1500000	158	7900000	330000	800000	4800000	18330000	1200	600	0.726	0.112	0.082	0.728	0.118	0.086	0.997253	18330000	1503060	16826940	91.8	0	0	2	0	0	0.04	0
308	1.5	2250000	800	2000000	147	7350000	202500	600000	600000	13002500	1125	750	0.767	0.488	0.374	0.786	0.506	0.398	0.975827	13002500	4862935	8139565	62.6	0	0	3	0	0	0.32	0
309	3	4500000	1500	3750000	385	19250000	1400000	1200000	1800000	31900000	2670	890	0.717	0.432	0.309	0.728	0.44	0.321	0.98489	31900000	9857100	22042900	69.1	0	0	3	0	0	0.37	0
310	1	1500000	500	1250000	145	7250000	256000	600000	1200000	12056000	1125	1125	0.882	0.274	0.242	1	0.257	0.257	0.882	12056000	2917552	9138448	75.8	0	0	3	1	1	0.58	0
311	2	3000000	1200	3000000	355	17750000	740000	400000	400000	25290000	2624	1312	1	1	1	1	1	1	1	25290000	25290000	0	0	1	1	10	1	1	0.58	1
312	2	3000000	1400	3500000	356	17800000	700000	800000	1200000	27000000	1400	700	0.453	0.561	0.254	0.5	0.529	0.264	0.906	27000000	6858000	20142000	74.6	0	0	3	0	0	0.17	0
313	1	1500000	650	1625000	180	9000000	350000	400000	800000	13675000	1375	1375	0.911	0.459	0.418	1	0.436	0.436	0.911	13675000	5716150	7958850	58.2	1	1	6	1	1	0.65	1
314	1	1500000	700	1750000	198	9900000	349566	400000	800000	14699566	1600	1600	1	0.487	0.487	1	0.501	0.501	1	14699566	7.15869e+06	7.54088e+06	51.3	1	0	6	1	1	0.64	0
315	2	3000000	1200	3000000	324	16200000	983333	800000	1600000	2.55833e+07	2600	1300	0.917	0.413	0.379	0.953	0.398	0.379	0.962225	2.55833e+07	9.69608e+06	15887250	62.1	1	1	5	1	1	0.57	1
316	2	3000000	1000	2500000	325	16250000	345000	800000	800000	23695000	2316	1158	0.931	0.609	0.567	0.94	0.607	0.571	0.990426	23695000	1.34351e+07	1.02599e+07	43.3	1	1	6	1	1	0.65	1
317	2	3000000	1500	3750000	285	14250000	573333	800000	1200000	2.35733e+07	3000	1500	1	0.557	0.557	1	0.704	0.704	1	2.35733e+07	1.31303e+07	1.0443e+07	44.3	1	1	6	1	1	0.67	1
318	1.5	2250000	750	1875000	168	8400000	404000	600000	900000	14429000	1500	1000	0.845	0.443	0.374	0.845	0.458	0.387	1	14429000	5396446	9032554	62.6	0	0	5	0	0	0.42	0
319	2	3000000	1000	2500000	156	7800000	700000	1200000	1200000	16400000	1500	750	0.901	0.264	0.238	0.908	0.271	0.246	0.992291	16400000	3903200	12496800	76.2	0	0	3	1	1	0.63	0
320	1	1500000	600	1500000	125	6250000	190000	400000	2000000	11840000	1000	1000	0.792	0.2	0.158	1	0.171	0.171	0.792	11840000	1870720	9969280	84.2	0	0	3	0	0	0.43	0
321	2	3000000	1200	3000000	187	9350000	470000	1200000	4800000	21820000	1800	900	0.904	0.127	0.115	0.911	0.129	0.117	0.992316	21820000	2509300	19310700	88.5	0	0	3	1	1	0.46	0
322	2	3000000	800	2000000	150	7500000	685333	1600000	1200000	1.59853e+07	1300	650	0.812	0.226	0.183	0.816	0.235	0.192	0.995098	1.59853e+07	2925316	1.306e+07	81.7	0	0	3	0	0	0.53	0
323	1	1500000	500	1250000	113	5650000	163500	400000	600000	9563500	950	950	0.84	0.441	0.37	1	0.402	0.402	0.84	9563500	3538495	6025005	63	0	0	4	1	1	0.58	0
324	1	1500000	300	750000	78	3900000	291667	600000	1200000	8.24167e+06	650	650	0.781	0.177	0.138	1	0.16	0.16	0.781	8.24167e+06	1137350	7.10432e+06	86.2	0	0	3	1	1	0.52	0
325	1	1500000	600	1500000	121	6050000	344000	200000	600000	10194000	1000	1000	0.784	0.543	0.425	1	0.459	0.459	0.784	10194000	4332450	5861550	57.5	1	0	4	0	0	0.39	0
326	1	1500000	500	1250000	90	4500000	172000	400000	600000	8422000	700	700	0.745	0.365	0.272	1	0.31	0.31	0.745	8422000	2290784	6131216	72.8	0	0	3	0	0	0.3	0
327	1	1500000	300	750000	112	5600000	380000	600000	600000	9430000	550	550	0.579	0.298	0.173	1	0.221	0.221	0.579	9430000	1631390	7798610	82.7	0	0	2	0	0	0.28	0
328	1.5	2250000	750	1875000	145	7250000	540000	600000	1500000	14015000	990	660	0.642	0.269	0.172	0.667	0.279	0.186	0.962519	14015000	2410580	11604420	82.8	0	0	3	0	0	0.34	0
329	1	1500000	600	1500000	120	6000000	170000	400000	800000	10370000	1100	1100	0.916	0.387	0.354	1	0.377	0.377	0.916	10370000	3670980	6699020	64.6	0	0	5	1	1	0.59	0
330	1	1500000	300	750000	78	3900000	142500	200000	1200000	7692500	500	500	0.649	0.206	0.134	1	0.188	0.188	0.649	7692500	1030795	6661705	86.6	0	0	2	0	0	0.08	0
331	3	4500000	1500	3750000	457	22850000	805500	1200000	7200000	40305500	2400	800	0.627	0.171	0.107	0.651	0.165	0.108	0.963134	40305500	4.31269e+06	3.59928e+07	89.3	0	0	2	0	0	0.03	0
332	1	1500000	300	750000	89	4450000	165000	400000	400000	7665000	650	650	0.722	0.443	0.32	1	0.369	0.369	0.722	7665000	2452800	5212200	68	0	0	4	0	0	0.11	0
333	1	1500000	600	1500000	123	6150000	180000	400000	400000	10130000	1000	1000	0.824	0.593	0.488	1	0.526	0.526	0.824	10130000	4943440	5186560	51.2	1	1	6	1	1	0.37	1
334	1	1500000	400	1000000	112	5600000	360000	400000	200000	9060000	550	550	0.512	0.632	0.323	1	0.414	0.414	0.512	9060000	2926380	6133620	67.7	0	0	4	0	0	0.11	0
335	1	1500000	600	1500000	125	6250000	195000	400000	400000	10245000	950	950	0.768	0.599	0.46	1	0.499	0.499	0.768	10245000	4712700	5532300	54	0	1	5	0	0	0.2	1
336	2	3000000	1000	2500000	240	12000000	466000	400000	400000	18766000	1700	850	0.81	0.896	0.726	0.811	0.918	0.744	0.998767	18766000	13624116	5141884	27.4	1	1	7	0	0	0.41	1
337	2	3000000	1200	3000000	190	9500000	708000	800000	800000	17808000	1740	870	0.861	0.454	0.391	0.866	0.462	0.4	0.994226	17808000	6962928	10845072	60.9	0	0	4	1	1	0.51	0
338	1	1500000	600	1500000	132	6600000	238500	400000	200000	10438500	925	925	0.757	0.775	0.587	1	0.639	0.639	0.757	10438500	6.1274e+06	4.3111e+06	41.3	1	1	4	0	0	0.15	1
339	2	3000000	1300	3250000	285	14250000	332000	800000	800000	22432000	2230	1115	0.819	0.669	0.548	0.824	0.67	0.553	0.993932	22432000	1.22927e+07	1.01393e+07	45.2	1	1	5	1	1	0.13	1
340	1	1500000	300	750000	121	6050000	268500	400000	400000	9368500	600	600	0.632	0.444	0.28	1	0.329	0.329	0.632	9368500	2623180	6745320	72	0	0	4	0	0	0.27	0
341	2	3000000	800	2000000	257	12850000	405000	800000	800000	19855000	1300	650	0.591	0.531	0.314	0.593	0.554	0.329	0.996627	19855000	6234470	13620530	68.6	0	0	3	0	0	0.03	0
342	2	3000000	1200	3000000	240	12000000	333333	1200000	800000	2.03333e+07	1950	975	0.824	0.486	0.4	0.825	0.494	0.407	0.998788	2.03333e+07	8.13333e+06	12200000	60	0	0	4	1	1	0.13	0
343	1	1500000	400	1000000	85	4250000	110000	2400000	2400000	11660000	600	600	0.713	0.074	0.053	1	0.062	0.062	0.713	11660000	617980	11042020	94.7	0	0	2	0	0	0.11	0
344	1.5	2250000	900	2250000	185	9250000	240000	600000	600000	15190000	1335	890	0.738	0.594	0.439	0.742	0.618	0.459	0.994609	15190000	6668410	8521590	56.1	0	0	4	0	0	0.13	0
345	2	3000000	1200	3000000	298	14900000	600000	4800000	4800000	31100000	2242	1121	0.807	0.121	0.098	0.814	0.121	0.098	0.9914	31100000	3047800	28052200	90.2	0	0	2	0	0	0.56	0
346	1	1500000	600	1500000	98	4900000	561560	400000	200000	9061560	850	850	0.837	0.532	0.445	1	0.491	0.491	0.837	9061560	4.03239e+06	5.02917e+06	55.5	1	1	4	1	1	0.58	1
347	1.5	2250000	1000	2500000	198	9900000	367500	3600000	900000	19517500	1500	1000	0.729	0.206	0.151	0.761	0.205	0.156	0.95795	19517500	2.94714e+06	1.65704e+07	84.9	0	0	3	0	0	0.32	0
348	2	3000000	1000	2500000	154	7700000	300000	4800000	1200000	19500000	1260	630	0.781	0.123	0.096	0.79	0.128	0.101	0.988608	19500000	1872000	17628000	90.4	0	0	2	0	0	0.27	0
349	1	1500000	600	1500000	132	6600000	302460	400000	400000	10702460	500	500	0.376	0.611	0.23	1	0.323	0.323	0.376	10702460	2.46157e+06	8.24089e+06	77	0	0	3	0	0	0.08	0
350	2	3000000	1200	3000000	240	12000000	480000	1600000	2400000	22480000	1960	980	0.778	0.25	0.194	0.78	0.253	0.198	0.997436	22480000	4361120	18118880	80.6	0	0	3	0	0	0.19	0
351	3	4500000	1400	3500000	487	24350000	1456140	600000	1800000	36206140	1800	600	0.491	0.489	0.24	0.519	0.473	0.246	0.94605	36206140	8.68947e+06	2.75167e+07	76	0	0	3	0	0	0.06	0
352	2	3000000	1200	3000000	253	12650000	1152410	400000	1200000	21402410	1200	600	0.454	0.51	0.232	0.5	0.489	0.245	0.908	21402410	4.96536e+06	1.64371e+07	76.8	0	0	3	0	0	0.15	0
353	2	3000000	1000	2500000	186	9300000	486000	400000	1600000	17286000	1560	780	0.794	0.353	0.281	0.801	0.362	0.29	0.991261	17286000	4857366	12428634	71.9	0	0	3	0	0	0.27	0
354	2	3000000	1200	3000000	245	12250000	341044	800000	1200000	20591044	1952	976	0.798	0.476	0.379	0.801	0.481	0.386	0.996255	20591044	7.80401e+06	1.2787e+07	62.1	0	0	4	0	0	0.35	0
355	2	3000000	900	2250000	185	9250000	165000	400000	2000000	17065000	1160	580	0.66	0.279	0.184	0.687	0.284	0.195	0.960699	17065000	3139960	13925040	81.6	0	0	2	0	0	0.31	0
356	2	3000000	1200	3000000	190	9500000	1350000	1200000	1600000	19650000	1800	900	0.89	0.252	0.224	0.896	0.255	0.229	0.993304	19650000	4401600	15248400	77.6	0	0	3	1	1	0.61	0
357	2	3000000	1500	3750000	285	14250000	1278000	1200000	2400000	25878000	3000	1500	1	0.297	0.297	1	0.375	0.375	1	25878000	7685766	18192234	70.3	0	0	5	0	0	0.7	0
358	1.5	2250000	750	1875000	168	8400000	252000	1200000	1800000	15777000	1500	1000	0.888	0.227	0.201	0.892	0.234	0.208	0.995516	15777000	3171177	12605823	79.9	0	0	3	1	1	0.36	0
359	2	3000000	1000	2500000	156	7800000	573333	1600000	2400000	1.78733e+07	1500	750	0.901	0.164	0.147	0.908	0.168	0.153	0.992291	1.78733e+07	2627380	1.5246e+07	85.3	0	0	4	1	1	0.48	0
360	1	1500000	600	1500000	125	6250000	269333	400000	600000	1.05193e+07	1000	1000	0.759	0.493	0.374	1	0.403	0.403	0.759	1.05193e+07	3.93423e+06	6.5851e+06	62.6	0	0	4	0	0	0.25	0
361	2	3000000	1200	3000000	187	9350000	700000	800000	1200000	18050000	1800	900	0.903	0.361	0.327	0.911	0.366	0.334	0.991218	18050000	5902350	12147650	67.3	0	0	4	1	1	0.6	0
362	2	3000000	800	2000000	150	7500000	475000	1200000	1200000	15375000	1300	650	0.813	0.263	0.214	0.816	0.274	0.224	0.996324	15375000	3290250	12084750	78.6	0	0	3	1	1	0.53	0
363	1	1500000	500	1250000	113	5650000	235000	400000	2000000	11035000	950	950	0.8	0.187	0.149	1	0.162	0.162	0.8	11035000	1644215	9390785	85.1	0	0	3	1	1	0.39	0
364	1	1500000	300	750000	78	3900000	428333	600000	2400000	9.57833e+06	650	650	0.781	0.104	0.081	1	0.093	0.093	0.781	9.57833e+06	775845	8.80249e+06	91.9	0	0	3	0	0	0.48	0
365	1	1500000	600	1500000	121	6050000	163500	800000	600000	10613500	1000	1000	0.831	0.358	0.297	1	0.32	0.32	0.831	10613500	3.15221e+06	7.46129e+06	70.3	0	0	3	1	1	0.57	0
366	1	1500000	500	1250000	90	4500000	233333	400000	600000	8.48333e+06	700	700	0.734	0.362	0.266	1	0.302	0.302	0.734	8.48333e+06	2.25657e+06	6.22677e+06	73.4	0	0	3	0	0	0.37	0
367	1	1500000	300	750000	112	5600000	344000	600000	1200000	9994000	550	550	0.579	0.2	0.116	1	0.148	0.148	0.579	9994000	1159304	8834696	88.4	0	0	3	0	0	0.22	0
368	1.5	2250000	750	1875000	145	7250000	258000	300000	900000	12833000	990	660	0.668	0.454	0.304	0.735	0.446	0.328	0.908844	12833000	3901232	8931768	69.6	0	0	3	0	0	0.16	0
369	1	1500000	600	1500000	120	6000000	570000	400000	600000	10570000	1100	1100	0.867	0.425	0.369	1	0.393	0.393	0.867	10570000	3900330	6669670	63.1	1	0	4	1	1	0.57	0
370	1	1500000	300	750000	78	3900000	360000	600000	600000	7710000	500	500	0.601	0.263	0.158	1	0.222	0.222	0.601	7710000	1218180	6491820	84.2	0	0	3	0	0	0.2	0
371	3	4500000	1500	3750000	457	22850000	510000	1200000	3000000	35810000	2400	800	0.635	0.347	0.22	0.651	0.34	0.221	0.975422	35810000	7878200	27931800	78	0	0	3	0	0	0.23	0
372	1	1500000	300	750000	89	4450000	142500	400000	800000	8042500	650	650	0.746	0.283	0.211	1	0.244	0.244	0.746	8042500	1.69697e+06	6.34553e+06	78.9	0	0	3	0	0	0.22	0
373	1	1500000	600	1500000	123	6150000	268500	200000	1200000	10818500	1000	1000	0.788	0.328	0.258	1	0.278	0.278	0.788	10818500	2791173	8027327	74.2	0	0	3	0	0	0.27	0
374	1	1500000	400	1000000	112	5600000	165000	400000	2400000	11065000	550	550	0.503	0.149	0.075	1	0.096	0.096	0.503	11065000	829875	10235125	92.5	0	0	2	0	0	0.16	0
375	1	1500000	600	1500000	125	6250000	135000	400000	400000	10185000	950	950	0.79	0.601	0.474	1	0.515	0.515	0.79	10185000	4827690	5357310	52.6	1	1	4	0	0	0.34	1
376	2	3000000	1000	2500000	240	12000000	933333	800000	1200000	2.04333e+07	1700	850	0.697	0.424	0.296	0.697	0.435	0.303	1	2.04333e+07	6.04827e+06	1.43851e+07	70.4	0	0	3	0	0	0.35	0
377	2	3000000	1200	3000000	190	9500000	512000	1200000	2400000	19612000	1740	870	0.862	0.217	0.187	0.866	0.221	0.191	0.995381	19612000	3667444	15944556	81.3	0	0	3	1	1	0.56	0
378	1	1500000	600	1500000	132	6600000	370000	200000	200000	10370000	925	925	0.768	0.919	0.705	1	0.768	0.768	0.768	10370000	7310850	3059150	29.5	1	1	7	0	0	0.35	1
379	2	3000000	1300	3250000	285	14250000	700000	800000	1200000	23200000	2230	1115	0.788	0.513	0.405	0.79	0.517	0.408	0.997468	23200000	9396000	13804000	59.5	0	1	5	0	0	0.51	1
380	1	1500000	300	750000	121	6050000	195000	400000	2400000	11295000	600	600	0.638	0.127	0.081	1	0.095	0.095	0.638	11295000	914895	10380105	91.9	0	0	2	0	0	0.35	0
381	2	3000000	800	2000000	257	12850000	520000	1200000	400000	19970000	1300	650	0.638	0.51	0.325	0.64	0.533	0.341	0.996875	19970000	6490250	13479750	67.5	0	0	3	0	0	0.21	0
382	2	3000000	1200	3000000	240	12000000	390000	400000	400000	19190000	1950	975	0.96	0.897	0.861	0.979	0.893	0.875	0.980592	19190000	16522590	2667410	13.9	1	1	9	1	1	0.45	1
383	1	1500000	400	1000000	85	4250000	238000	400000	400000	7788000	600	600	0.665	0.428	0.285	1	0.334	0.334	0.665	7788000	2219580	5568420	71.5	0	0	2	0	0	0.27	0
384	1.5	2250000	900	2250000	185	9250000	162000	600000	600000	15112000	1335	890	0.759	0.593	0.451	0.774	0.609	0.471	0.98062	15112000	6815512	8296488	54.9	1	1	4	0	0	0.1	1
385	2	3000000	1200	3000000	298	14900000	446000	2400000	4000000	27746000	2242	1121	0.807	0.175	0.141	0.815	0.174	0.142	0.990184	27746000	3912186	23833814	85.9	0	0	2	0	0	0.22	0
386	1	1500000	600	1500000	98	4900000	118000	2200000	1600000	11818000	850	850	0.883	0.11	0.097	1	0.107	0.107	0.883	11818000	1146346	10671654	90.3	0	0	2	1	1	0.17	0
387	1.5	2250000	1000	2500000	198	9900000	265500	2400000	1500000	18815500	1500	1000	0.762	0.217	0.166	0.767	0.223	0.171	0.993481	18815500	3123373	15692127	83.4	0	0	3	0	0	0.25	0
388	2	3000000	1000	2500000	154	7700000	1351836	2400000	3600000	20551836	1260	630	0.767	0.104	0.08	0.77	0.109	0.084	0.996104	20551836	1.64415e+06	1.89077e+07	92	0	0	2	0	0	0.45	0
389	1	1500000	600	1500000	132	6600000	330000	2400000	400000	12730000	500	500	0.375	0.215	0.081	1	0.114	0.114	0.375	12730000	1031130	11698870	91.9	0	0	2	0	0	0.12	0
390	2	3000000	1200	3000000	240	12000000	342000	800000	4800000	23942000	1960	980	0.816	0.163	0.133	0.819	0.165	0.135	0.996337	23942000	3184286	20757714	86.7	0	0	2	0	0	0.29	0
391	3	4500000	1400	3500000	487	24350000	832500	1200000	600000	34982500	1800	600	0.529	0.701	0.371	0.534	0.71	0.379	0.990637	34982500	1.29785e+07	2.2004e+07	62.9	0	0	4	0	0	0.05	0
392	2	3000000	1200	3000000	253	12650000	312000	2000000	4800000	25762000	1200	600	0.482	0.146	0.07	0.5	0.148	0.074	0.964	25762000	1803340	23958660	93	0	0	2	0	0	0.12	0
393	2	3000000	1000	2500000	186	9300000	760000	4400000	4400000	24360000	1560	780	0.787	0.093	0.073	0.792	0.095	0.076	0.993687	24360000	1778280	22581720	92.7	0	0	2	1	1	0.48	0
394	2	3000000	1200	3000000	245	12250000	450000	4800000	4800000	28300000	1952	976	0.769	0.111	0.085	0.771	0.113	0.087	0.997406	28300000	2405500	25894500	91.5	0	0	2	1	1	0.04	0
395	2	3000000	900	2250000	185	9250000	600000	4800000	4400000	24300000	1160	580	0.588	0.09	0.053	0.59	0.095	0.056	0.99661	24300000	1287900	23012100	94.7	0	0	2	0	0	0.09	0
396	2	3000000	1200	3000000	190	9500000	640000	4800000	4800000	25740000	1800	900	0.89	0.088	0.078	0.896	0.089	0.08	0.993304	25740000	2007720	23732280	92.2	0	0	1	1	1	0.5	0
397	3	4500000	1800	4500000	485	24250000	1050000	7200000	7200000	48700000	3375	1125	0.794	0.123	0.097	0.852	0.168	0.143	0.931925	48700000	4723900	43976100	90.3	0	0	2	0	0	0.38	0
398	1.5	2250000	1000	2500000	210	10500000	480000	600000	900000	17230000	1500	1000	0.703	0.522	0.367	0.732	0.519	0.38	0.960383	17230000	6323410	10906590	63.3	0	0	3	0	0	0.34	0
399	2	3000000	1200	3000000	221	11050000	370000	1200000	2400000	21020000	1900	950	0.84	0.247	0.207	0.844	0.25	0.211	0.995261	21020000	4351140	16668860	79.3	0	0	3	1	1	0.32	0
400	2	3000000	1000	2500000	223	11150000	390000	800000	4800000	22640000	1720	860	0.752	0.155	0.116	0.753	0.158	0.119	0.998672	22640000	2626240	20013760	88.4	0	0	2	0	0	0.46	0
401	2	3000000	1000	2500000	243	12150000	520000	1200000	400000	19770000	1758	879	0.766	0.574	0.44	0.767	0.587	0.45	0.998696	19770000	8698800	11071200	56	1	0	4	0	0	0.34	0
402	2	3000000	1200	3000000	298	14900000	390000	400000	400000	22090000	2000	1000	0.985	0.897	0.883	1	0.896	0.896	0.985	22090000	19505470	2584530	11.7	1	1	9	1	1	0.48	1
403	2	3000000	600	1500000	158	7900000	476000	800000	800000	14476000	1200	600	0.714	0.398	0.285	0.72	0.417	0.3	0.991667	14476000	4125660	10350340	71.5	0	0	0	0	0	0.31	0
404	1.5	2250000	800	2000000	147	7350000	162000	600000	600000	12962000	1125	750	0.786	0.483	0.38	0.817	0.494	0.403	0.962056	12962000	4925560	8036440	62	0	0	4	0	0	0.13	0
405	3	4500000	1500	3750000	385	19250000	669000	3600000	6000000	37769000	2670	890	0.717	0.156	0.112	0.728	0.159	0.116	0.98489	37769000	4230128	33538872	88.8	0	0	2	0	0	0.13	0
406	1	1500000	500	1250000	145	7250000	118000	2200000	1600000	13918000	1125	1125	0.906	0.142	0.128	1	0.136	0.136	0.906	13918000	1781504	12136496	87.2	0	0	3	1	1	0.2	0
407	2	3000000	1200	3000000	355	17750000	354000	3200000	2000000	29304000	2624	1312	0.927	0.234	0.217	0.963	0.226	0.217	0.962617	29304000	6358968	22945032	78.3	0	0	3	1	1	0.42	0
408	2	3000000	1400	3500000	356	17800000	1351836	2400000	3600000	31651836	1400	700	0.452	0.196	0.089	0.5	0.185	0.092	0.904	31651836	2.81701e+06	2.88348e+07	91.1	0	0	2	0	0	0.13	0
409	1	1500000	650	1625000	180	9000000	330000	2400000	400000	15255000	1375	1375	0.923	0.24	0.222	1	0.231	0.231	0.923	15255000	3386610	11868390	77.8	1	0	4	1	1	0.66	0
410	1	1500000	700	1750000	198	9900000	171000	400000	2400000	16121000	1600	1600	1	0.217	0.217	1	0.224	0.224	1	16121000	3498257	12622743	78.3	1	0	4	1	1	0.47	0
411	2	3000000	1200	3000000	324	16200000	555000	800000	400000	23955000	2600	1300	0.986	0.816	0.804	0.986	0.816	0.805	1	23955000	19259820	4695180	19.6	1	1	9	1	1	0.51	1
412	2	3000000	1000	2500000	325	16250000	312000	2000000	4800000	28862000	2316	1158	0.919	0.147	0.135	0.94	0.145	0.136	0.97766	28862000	3896370	24965630	86.5	0	0	3	1	1	0.21	0
413	1.5	2250000	1000	2500000	289	14450000	570000	3300000	3300000	26370000	2077	1384.67	0.896	0.145	0.13	0.933	0.141	0.132	0.960343	26370000	3428100	22941900	87	0	0	3	1	1	0.59	0
414	1	1500000	500	1250000	120	6000000	225000	2400000	2400000	13775000	1000	1000	0.822	0.107	0.088	1	0.094	0.094	0.822	13775000	1212200	12562800	91.2	0	0	3	1	1	0.09	0
415	2	3000000	1200	3000000	289	14450000	600000	4800000	4400000	30250000	2500	1250	0.907	0.126	0.114	0.919	0.124	0.114	0.986942	30250000	3448500	26801500	88.6	0	0	3	1	1	0.41	0
416	2	3000000	1000	2500000	278	13900000	640000	4800000	4800000	29640000	2000	1000	0.791	0.11	0.087	0.807	0.109	0.088	0.980173	29640000	2578680	27061320	91.3	0	0	2	0	0	0.4	0
417	2	3000000	1000	2500000	267	13350000	700000	4800000	4800000	29150000	2116	1058	0.845	0.109	0.092	0.857	0.108	0.093	0.985998	29150000	2681800	26468200	90.8	0	0	2	1	1	0.44	0
418	1	1500000	600	1500000	145	7250000	320000	400000	600000	11570000	1380	1380	1	0.506	0.506	1	0.528	0.528	1	11570000	5854420	5715580	49.4	1	1	7	1	1	0.64	1
419	1	1500000	600	1500000	123	6150000	185000	600000	1200000	11135000	1000	1000	0.806	0.271	0.218	1	0.235	0.235	0.806	11135000	2427430	8707570	78.2	0	0	3	1	1	0.29	0
420	1	1500000	400	1000000	112	5600000	350000	200000	200000	8850000	550	550	0.528	0.806	0.426	1	0.545	0.545	0.528	8850000	3770100	5079900	57.4	0	0	5	0	0	0.16	0
421	1	1500000	600	1500000	125	6250000	350000	400000	600000	10600000	950	950	0.721	0.478	0.345	1	0.374	0.374	0.721	10600000	3657000	6943000	65.5	0	0	4	0	0	0.32	0
422	2	3000000	1000	2500000	240	12000000	932176	800000	1600000	20832176	1700	850	0.696	0.358	0.249	0.697	0.367	0.256	0.998565	20832176	5.18721e+06	1.5645e+07	75.1	0	0	4	0	0	0.25	0
423	2	3000000	1200	3000000	190	9500000	590000	800000	1600000	18490000	1740	870	0.86	0.313	0.269	0.866	0.318	0.276	0.993072	18490000	4973810	13516190	73.1	0	0	3	1	1	0.27	0
424	1	1500000	600	1500000	132	6600000	380000	400000	800000	11180000	925	925	0.689	0.404	0.279	1	0.304	0.304	0.689	11180000	3119220	8060780	72.1	0	0	3	0	0	0.33	0
